1 **Proximity Biotin Labeling Reveals KSHV Interferon Regulatory Factor**  
2 **Networks**

3  
4 Ashish Kumar<sup>1</sup>, Michelle Salemi<sup>2</sup>, Resham Bhullar<sup>1</sup>, Sara Guevara-Plunkett<sup>1</sup>,  
5 Yuanzhi Lyu<sup>1</sup>, Kang-Hsin Wang<sup>1</sup>, Chie Izumiya<sup>1</sup>, Mel Campbell<sup>1</sup>, Ken-ichi Nakajima<sup>1</sup>, &  
6 Yoshihiro Izumiya<sup>1, 3, 4, \*</sup>  
7

8  
9 <sup>1</sup> Department of Dermatology School of Medicine, University of California Davis (UC Davis),  
10 Sacramento, California USA

11 <sup>2</sup> Genome Center, Proteomics Core, Genome and Biomedical Sciences Facility, UC Davis,  
12 Davis, California, USA

13 <sup>3</sup> Department of Biochemistry and Molecular Medicine, School of Medicine, UC Davis,  
14 Sacramento, California USA

15 <sup>4</sup> Viral Oncology and Pathogens-Associated Malignancies Initiative, UC Davis Comprehensive  
16 Cancer Center, Sacramento, California USA  
17  
18  
19

20 Short Title: Proximity Biotin Ligation for KSHV  
21  
22

23 \*Correspondence: Yoshihiro Izumiya DVM, PhD

24 Address: UCDCMC Research III Room 2200B, 4645 2<sup>nd</sup> Avenue, Sacramento CA 95817

25 E. mail: [yizumiya@ucdavis.edu](mailto:yizumiya@ucdavis.edu)

26 Phone: 916-734-7253  
27  
28

29 Key words: KSHV, TurboID, proteomics  
30  
31

32 Word count:

33  
34 Abstract: 239

35 Importance: 102

36 **Abstract**

37 Studies on "HIT&RUN" effects by viral protein are difficult when using traditional affinity  
38 precipitation-based techniques under dynamic conditions, because only proteins  
39 interacting at a specific instance in time can be precipitated by affinity purification.  
40 Recent advances in proximity labeling (PL) have enabled study of both static and  
41 dynamic protein-protein interactions. Here we applied PL method with recombinant  
42 Kaposi's sarcoma-associated herpesvirus (KSHV). KSHV, a gamma-herpesvirus,  
43 uniquely encodes four interferon regulatory factors (IRFs 1-4) in the genome, and we  
44 identified KSHV vIRF-1 and vIRF-4 interacting proteins during reactivation. Fusion of  
45 mini-TurboID with vIRF-1 or vIRF-4 did not interfere with KSHV gene expression, DNA  
46 replication, or *de novo* infections. PL identified 213 and 70 proteins for vIRF-1 and vIRF-  
47 4 respectively, which possibly interact during KSHV reactivation, and 47 of those were  
48 shared between the two vIRFs; the list also includes three viral proteins, ORF17,  
49 thymidine kinase, and vIRF-4. Functional annotation of respective interacting proteins  
50 showed highly overlapping biological functions such as mRNA processing and  
51 transcriptional regulation by TP53. Involvement of commonly interacting 44 cellular  
52 proteins in innate immune regulation were examined by siRNAs, and we identified that  
53 splicing factor 3B (SF3B) family proteins were clearly involved in interferons  
54 transcription and suppressed KSHV reactivation. We propose that recombinant  
55 TurboID-KSHV is a powerful tool to probe key cellular proteins that play a role in KSHV  
56 replication, and selective splicing factors may have a function beyond connecting two  
57 exon sequences to regulate innate immune responses.

58

## 59 **Importance**

60 Viral protein interaction with a host protein shows at least two sides: (i) taking host  
61 protein functions for its own benefit and (ii) disruption of existing host protein complex  
62 formation to inhibit undesirable host responses. Due to use of affinity-precipitation  
63 approaches, the majority of our studies focused on how the virus takes advantage of the  
64 newly-formed protein interactions for its own replication. Proximity labeling (PL)  
65 however, can also highlight the transient and negative effects – those interactions which  
66 lead to dissociation from the existing protein complex. Here we highlight the power of  
67 PL in combination with recombinant KSHV to study viral host interactions.

## 68 **Introduction**

69 Kaposi sarcoma herpesvirus (KSHV) is a pathogen associated with endothelial Kaposi's  
70 sarcoma (KS) (1, 2), B-cell malignancies such as primary effusion lymphoma (PEL), and  
71 AIDS related multicentric Castleman's disease (MCD) (3-6). In these cancer cells,  
72 KSHV mostly exhibits latent infection, where most of the viral genes are silenced to  
73 escape recognition by the host immune system. However, small population of infected  
74 cells undergo spontaneous reactivation, where all of the KSHV genes are expressed for  
75 production of progeny virions. Although lytic replication produces infectious virions and  
76 facilitates transmission of the virus to neighboring cells or host, it also increases the risk  
77 of the virus being caught by the host immune system (7). Host immune systems detect  
78 pathogens through binding of pathogen associated molecular pattern (PAMPs) to  
79 pattern recognition receptors (PRRs). Several PRRs such as IFI16 (8, 9), RIG-I (10-12),  
80 TLR9 (13), TLR3 (14), TLR4 (15), and NLRP1 (16) are known to detect KSHV  
81 associated PAMPs. The recognition of KSHV DNA by PRRs leads to phosphorylation,  
82 dimerization, and nuclear translocation of IRF3/IRF7. IRF3/IRF7 binds to DNA through  
83 its DNA binding domain (DBD), which results in secretion of cytokines and interferons  
84 (IFN). To counteract the host response, KSHV encodes several immunomodulatory  
85 proteins such as viral-interferon regulatory factors (vIRFs) that inhibit the antiviral  
86 response and aid viral replication (17, 18).

87 KSHV genome encodes four vIRFs, vIRF-1-4. The N-termini of vIRFs exhibit similarity  
88 to N-termini of cellular IRFs, however viral IRFs lack a key tryptophan residue, which is  
89 required for binding to DNA (19). vIRF-1, vIRF-2, and vIRF-4 are inducible lytic genes,  
90 although vIRF-1 can also be found in a small portion of latently infected cells. In contrast,

91 vIRF-3 (also known as LANA2) was discovered as a latent protein and its expression  
92 remains unchanged during reactivation (20). Studies on the function of vIRFs found that  
93 vIRFs counteract the host IFN response by interacting with cellular proteins. vIRF-1  
94 suppresses cellular IRF3-mediated transcription by binding to p300, thereby preventing  
95 p300/CBP-IRF3 complex formation (21, 22). vIRF-1 also promotes KSHV lytic  
96 replication by recruitment of USP7 (23). vIRF-2 was found to inhibit KSHV lytic gene  
97 expression by increasing the expression of cellular antiviral factors like Promyelocytic  
98 leukemia nuclear bodies (PML) (24). Similarly, vIRF-3 suppresses KSHV reactivation by  
99 interacting with USP7, and the interaction also supports PEL cell growth (23).  
100 Furthermore, vIRF-4 has been found to play a crucial role in triggering the KSHV  
101 latency-to-lytic switch through interfering with the BCL6-vIRF-4 axis (25). vIRF-4 also  
102 associates with IRF7, and inhibits IRF7 dimerization to suppress IFN production (26).  
103 These studies sometimes showed different results in different cell lines, suggesting the  
104 significance of implementing proteomic approaches that can reveal vIRFs interaction  
105 networks more comprehensively. A broader view of the vIRFs interactomes will certainly  
106 help to understand their diverse protein functions.

107         Dynamic and stable protein-protein interactions are key to cellular processes and  
108 biological pathways. Affinity purification coupled with mass spectrometry (AP-MS) has  
109 been an invaluable method used to identify protein-protein interactions. However, AP-  
110 MS often fails to identify weakly or transiently interacting proteins. To overcome this  
111 drawback, enzyme-based Proximity-based labeling (PL) approaches have been  
112 developed. The approach provides sensitivity and specificity required to study dynamic  
113 protein-protein interaction. BirA<sub>R118G</sub> (BirID) was the first proximity-based labelling

114 enzyme identified in *E.coli* which conjugates biotin to lysine residues of neighboring  
115 proteins (27). However, original BirID required the presence of biotin for several hours  
116 to be able to biotinylate a sufficient amount of proteins for analysis, thereby restricting  
117 its use for dynamic processes. Recently, two variants of BirID have been developed by  
118 directed evolution named as mini-TurboID (28 kD) and TurboID (35 kD), which allow  
119 proximity labeling in less than 10 min without significant toxicity (28). The TurboID  
120 based approach has already been successfully employed in a wide variety of species  
121 including mammalian cells (28-32), *Drosophila* (33), plants (34-37), yeast (38), flies and  
122 worms (28). In this study, we prepared recombinant 3xFlag-mini-TurboID-vIRF-1 and  
123 3xFlag-mini-TurboID-vIRF-4 KSHV that employs mini-TurboID to biotinylate host and  
124 viral proteins in vicinity to these two viral proteins. The proximity-labeling approach  
125 combined with mass spectrometry identified both previously-identified cellular proteins,  
126 as well as new host proteins as their interacting partners. The siRNA screenings of  
127 these interacting proteins identified that selective splicing factors function to suppress  
128 KSHV reactivation and are associated with anti-viral responses.

129

## 130 **Materials and Methods**

### 131 **Chemicals**

132 Dulbecco's modified minimal essential medium (DMEM), Fetal bovine serum (FBS),  
133 phosphate buffered saline (PBS), Trypsin-EDTA solution, 100x Penicillin-streptomycin-  
134 L-Glutamine solution and Strep-HRP conjugate were purchased from Thermo Fisher  
135 (Waltham, MA USA). Puromycin and G418 solution were obtained from InvivoGen (San  
136 Diego, CA, USA). Hygromycin B solution was purchased from Enzo Life Science  
137 (Farmingdale, NY, USA). Anti-ORF57, anti-K8, and anti-K8.1, antibodies were  
138 purchased from Santa Cruz Biotechnology Inc (Santa Cruz, CA, USA). Anti-K-Rta  
139 antibody was described previously (39). All other chemicals were purchased from  
140 Millipore-Sigma (St. Louis, MO, USA) unless otherwise stated.

141

### 142 **Cells, siRNA transfection and reagents**

143 iSLK.219 cells were maintained in DMEM medium supplemented with 10% FBS, 10  
144 µg/ml puromycin, 400 µg/ml hygromycin B, and 250 µg/ml G418. iSLK cells were  
145 maintained in DMEM medium supplemented with 10% FBS, 1% penicillin-streptomycin  
146 solution and 10 µg/ml puromycin. iSLK cells were obtained from Dr. Don Ganem  
147 (Novartis Institutes for Biomedical Research). A549 cells were obtained from Dr.  
148 Tsucano (University of California, Davis). A549 cells were grown in DMEM containing  
149 10% FBS and 1% penicillin-streptomycin. Transfection of siRNA in iSLK.219 cells was  
150 performed with Lipofectamine RNAiMax reagent (Invitrogen) according to  
151 manufacturer's protocol.

152

153 **Quantification of viral replication**

154 siRNA targeting the cellular genes were transfected in iSLK.219 cells for 48h followed  
155 by KSHV reactivation by doxycycline (1  $\mu\text{g/ml}$ ). After 24h, the RFP fluorescence  
156 intensity was quantified using ImageJ software. The RFP signal intensity was  
157 normalized relative to non-targeting siRNA (NTC).

158

159 **Construction of vIRF-1 and vIRF-4 miniTurbo KSHV BAC16**

160 Recombinant KSHV was prepared by following a protocol for En passant mutagenesis  
161 with a two-step markerless red recombination technique (40). Briefly, codon optimized  
162 mini-TurboID coding sequence (Table 1), which also encodes 3x Flag tag was first  
163 cloned into a pBS SK vector (Thermo Fisher, Waltham, MA USA). The pEPkan-S  
164 plasmid was used as a source of the kanamycin cassette, which includes the I-SecI  
165 restriction enzyme site at the 5'-end of kanamycin coding region (40). Kanamycin  
166 cassette was amplified with primer pairs listed in Table 1, and cloned into the mini-  
167 TurboID coding region at a unique restriction enzyme site. The resulting plasmid was  
168 used as a template for another round of PCR to prepare a transfer DNA fragment for  
169 markerless recombination with BAC16 (41). Recombinant BAC clones with insertion  
170 and also deletion of the kanamycin cassette in the BAC16 genome were confirmed by  
171 colony PCR with appropriate primer pairs. Recombination junctions and adjacent  
172 genomic regions were amplified by PCR and the resulting PCR products were directly  
173 sequenced with the same primers to confirm in-frame insertion of mini-TurboID cassette  
174 into the BAC DNA. The resulting recombinant BAC was confirmed by restriction enzyme  
175 digestions (*HindIII* and *BglII*), if there were any large DNA deletions. Two independent



176 BAC clones were generated for each mini-TurbID tagged recombinant virus as  
177 biological replicates, and used one of the clone for protein ID. Entire BAC DNAs were  
178 subsequently sequenced.

179

## 180 **Western blotting**

181 Cells were lysed in IP lysis buffer (25 mM Tris-HCl pH 7.4, 150 mM NaCl, 1% NP-40, 1  
182 mM EDTA, 5% glycerol) containing protease inhibitors (Roche, Basel, Switzerland).  
183 Total cell lysates (25  $\mu$ g) were boiled in SDS-PAGE loading buffer and subjected to  
184 SDS-PAGE and subsequently transferred to a polyvinylidene fluoride membrane  
185 (Millipore-Sigma, St. Louis, MO, USA) using a semidry transfer apparatus (Bio-Rad,  
186 Hercules, CA, USA). Streptavidin-HRP conjugate was used at 1:3000 dilution. Final  
187 dilution of the primary antibody was 1:5,000 for anti-K-Rta rabbit serum, 1  $\mu$ g/mL of anti-  
188 K8 $\alpha$  (Santa Cruz, Santa Cruz, CA, USA), 1  $\mu$ g/mL of anti-ORF57 mouse monoclonal  
189 antibody (Santa Cruz, Santa Cruz, CA, USA), 1  $\mu$ g/mL of anti-K8.1 mouse monoclonal  
190 (Santa Cruz, Santa Cruz, CA, USA), and 1:5,000 for anti- $\beta$ -actin mouse monoclonal  
191 (Millipore-Sigma, St. Louis, MO, USA). Washing membranes and secondary antibody  
192 incubations were performed as described previously (42).

193

## 194 **Quantification of viral copy number**

195 Two hundred microliter of cell culture supernatant was treated with 12  $\mu$ g/ml of DNase I  
196 for 15 min at room temperature to degrade uncapsidated DNA. This reaction was  
197 stopped by the addition of EDTA to 5 mM followed by heating at 70°C for 15 min. Viral  
198 genomic DNA was purified using QIAamp DNA Mini Kit according to the manufacturer's

199 protocol, and eluted in 100  $\mu$ l of buffer AE. Four microliters of eluate was used for real-  
200 time qPCR to determine viral copy number, as described previously (42).

201

### 202 **Preparation of purified KSHV**

203 iSLK cells latently infected with mini-TurboID-KSHVs were seeded in eight to ten 15 cm  
204 dishes, and stimulated with 1  $\mu$ g/mL of doxycycline and 3 mM sodium butyrate (NaB) for  
205 24 h and further incubated with culture media without stimuli for 72 h. The culture  
206 supernatant was centrifuged using the Beckman SW28 rotor (25,000 rpm, for 2 h) with  
207 25% sucrose cushion. Virus pellet was dissolved in DMEM and further purified by  
208 discontinuous sucrose gradient (25-60%) centrifugation using Beckman SW40Ti rotor  
209 (21,000 rpm, for 16 h). The virus pellet was dissolved in DMEM for infection.

210

### 211 **Real time RT-PCR**

212 Total RNA was isolated using Quick-RNA miniprep kit (Zymo Research, Irvine, CA,  
213 USA). First strand cDNA was synthesized using High Capacity cDNA Reverse  
214 Transcription Kit (Thermo Fisher, Waltham, MA USA). Gene expression was analyzed  
215 by realtime qPCR using specific primers for KSHV ORFs designed by Fakhari and  
216 Dittmer (43). We used 18S ribosomal RNA as an internal standard to normalize viral  
217 gene expression.

218

### 219 **Affinity purification of biotinylated proteins**

220 The affinity purification was done with streptavidin coated magnetic beads (Thermo-  
221 Fisher). Briefly, 150  $\mu$ l magnetic beads/sample were pre-washed with RIPA lysis buffer

222 (150 mM NaCl, 5 mM EDTA (pH 8), 50 mM Tris (pH 8), 1% NP-40, 0.5% sodium  
223 deoxycholate, 0.1% SDS) 3 times. Total 3 mg of whole cell lysate was incubated with  
224 pre-washed streptavidin beads at room temperature for 1h for rotation. The beads were  
225 collected using magnetic stand and washed three times with wash buffer according to  
226 manufacturer's protocol. Finally, beads were resuspended in 200  $\mu$ l of wash buffer and  
227 sent to UC Davis Proteomics core for on bead digestion and LC-MS/MS analysis.

228

### 229 **MS sample preparation**

230 Protein samples on magnetic beads were washed four times with 200  $\mu$ l of 50mM  
231 ammonium bicarbonate (AMBIC) with a twenty-minute shake time at 4°C in between  
232 each wash. Roughly 2.5  $\mu$ g of trypsin was added to the bead and AMBIC and the  
233 samples were digested over night at 800 rpm shake speed. After overnight digestion,  
234 the supernatant was removed, and the beads were washed once with enough 50 mM  
235 ammonium bicarbonate to cover. After 20 minutes at a gentle shake the wash is  
236 removed and combined with the initial supernatant. The peptide extracts are reduced in  
237 volume by vacuum centrifugation and a small portion of the extract is used for  
238 fluorometric peptide quantification (Thermo scientific Pierce). One microgram of sample  
239 based on the fluorometric peptide assay was loaded for each LC-MS analysis.

240 Digested peptides were analyzed by LC-MS/MS on a Thermo Scientific Q Exactive  
241 Orbitrap Mass spectrometer in conjunction Proxeon Easy-nLC II HPLC (Thermo  
242 Scientific) and Proxeon nanospray source. The digested peptides were loaded a 100  
243 micron x 25 mm Magic C18 100Å 5U reverse phase trap where they were desalted  
244 online before being separated using a 75 micron x 150 mm Magic C18 200Å 3U reverse

245 phase column. Peptides were eluted using a 60-minute gradient with a flow rate of 300  
246 nl/min. An MS survey scan was obtained for the m/z range 300-1600, MS/MS spectra  
247 were acquired using a top 15 method, where the top 15 ions in the MS spectra were  
248 subjected to HCD (High Energy Collisional Dissociation). An isolation mass window of  
249 2.0 m/z was for the precursor ion selection, and normalized collision energy of 27% was  
250 used for fragmentation. A fifteen second duration was used for the dynamic exclusion.

251

## 252 **MS/MS analysis**

253 Tandem mass spectra were extracted and charge state deconvoluted by Proteome  
254 Discoverer (Thermo Scientific) All MS/MS samples were analyzed using X! All MS/MS  
255 samples were analyzed using X! Tandem (The GPM, [thegpm.org](http://thegpm.org); version X! Tandem  
256 Alanine (2017.2.1.4)). X! Tandem was set up to search the Human and Kaposi Sarcoma  
257 Herpes virus database (149182 entries) assuming the digestion enzyme trypsin. X!  
258 Tandem was searched with a fragment ion mass tolerance of 20 PPM and a parent ion  
259 tolerance of 20 PPM. Carbamidomethyl of cysteine and selenocysteine was specified in  
260 X! Tandem as a fixed modification. Glu->pyro-Glu of the N-terminus, ammonia-loss of  
261 the N-terminus, gln->pyro-Glu of the N-terminus, deamidated of asparagine and  
262 glutamine, oxidation of methionine and tryptophan and dioxidation of methionine and  
263 tryptophan were specified in X! Tandem as variable modifications.

264 Scaffold (version Scaffold\_4.8.4, Proteome Software Inc., Portland, OR) was used to  
265 validate MS/MS based peptide and protein identifications. Peptide identifications were  
266 accepted if they could be established at greater than 98.0% probability by the Scaffold  
267 Local FDR algorithm. Peptide identifications were also required to exceed specific

268 database search engine thresholds. Protein identifications were accepted if they could  
269 be established at greater than 5.0% probability to achieve an FDR less than 5.0% and  
270 contained at least 2 identified peptides. Protein probabilities were assigned by the  
271 Protein Prophet algorithm (44). Proteins that contained similar peptides and could not  
272 be differentiated based on MS/MS analysis alone were grouped to satisfy the principles  
273 of parsimony. Proteins sharing significant peptide evidence were grouped into clusters.

274

### 275 **Pathway analysis**

276 The proteins identified to be interacting with vIRF-1 and vIRF-4 were used for Gene  
277 ontology and network analysis. The top gene ontology processes were enriched by  
278 Metascape web-based platform, and the Metascape software was used for gene  
279 ontology and network analysis (45).

280

### 281 **Statistical analysis**

282 Results are shown as mean  $\pm$  SD from at least three independent experiments. Data  
283 was analyzed using unpaired Student's t test, or ANOVA followed by Tukey's HSD test.  
284 A value of  $p < 0.05$  was considered statistically significant.

285

286

287 **Results**

288 **Construction of 3xFlag-mini-TurboID-K9 and 3xFlag-mini-TurboID-K10 KSHV**

289 **BAC16.** Biotin labelled proximity labeling (PL) has emerged as a powerful method for  
290 probing various target proteins in a wide variety of species including mammalian cells  
291 and unicellular organism (28, 32, 33, 35, 37, 38). We thought that applying the  
292 technique to virology would be particularly beneficial, because not only viral-host  
293 interactions are inherently dynamic but viruses are also completely dependent on host  
294 cell machinery for their replication. In fact, many key cellular proteins, such as p53, were  
295 identified from virology as viral protein interacting proteins. Our major goal is thus to  
296 report on the successful application and utility of PL in conjunction with recombinant  
297 KSHV BAC system.

298 To generate recombinant KSHV conveniently, we first prepared a template  
299 plasmid, which is used to create PCR fragments for recombination. The template  
300 encodes a 3xFlag tag at the N-terminus of mini-TurboID and kanamycin cassettes in  
301 mini-TurboID coding region as an excisable format with I-SceI induction. The 3xFlag-  
302 mini-TurboID-kana DNA fragment was amplified with primers with homology arms, and  
303 amplified fragments were then used for recombination by using a two-step  
304 recombination approach as previously described (40) (**Figure 1A**). The 3xFlag-mini-  
305 TurboID-K9 and 3xFlag-mini-TurboID-K10 BAC16 were directly transfected into iSLK  
306 cells and selected with hygromycin (1 mg/ml) to generate iSLK cells harboring latent  
307 3xFlag-miniTurboID-K9 KSHV genome (named as vIRF-1 mini-TurboID cells) and  
308 3xFlag-mini-TurboID-K10 KSHV (named as vIRF-4 mini-TurboID cells) (**Figure 1B**).

309           Next, optimal concentration of exogenous biotin and duration of incubation time  
310 for efficient labelling was determined. The vIRF-1 and vIRF-4 mini-TurboID cells were  
311 reactivated for 24 h, incubated with varying concentration of biotin (0, 125, 250 and 500  
312  $\mu\text{M}$ ) for 1 h, and subsequently monitored for their biotinylation signal in whole cell  
313 lysates using streptavidin immunoblots. Untreated cells in absence of biotin were used  
314 as negative control. Immunoblot analysis using the HRP-conjugated streptavidin  
315 showed multiple biotinylated protein indicating successful labelling of proteins with vIRF-  
316 1 and vIRF-4 tagged mini-TurboID. Comparable levels of signal intensity were observed  
317 until 500  $\mu\text{M}$ , suggesting that saturation of protein biotinylation occurs at 125  $\mu\text{M}$   
318 (**Figure 1C**). Similarly, vIRF-1 Turbo and vIRF-4 mini-TurboID cells were incubated with  
319 biotin for various time periods. Biotinylation signal was seen within 15 mins after  
320 addition of exogenous biotin and streptavidin signals gradually increased along with  
321 incubation time (**Figure 1D**). Considering only a small proportion of cells were  
322 reactivating in a dish, we concluded that there was a sufficient amount of biotinylation in  
323 the cells for protein identification. For following studies, we decided to use a saturating  
324 amount of biotin (500  $\mu\text{M}$ ) for 60 mins incubation.

325  
326 **Gene expression in vIRF-1 and vIRF-4 mini-TurboID cells.** We next verified the  
327 induction of viral genes to ensure that tagging K9 or K10 gene with 3xFlag-mini-TurboID  
328 has little effects on viral gene expression and replication. For this, we stimulated vIRF-1  
329 and vIRF-4 mini-TurboID cells with Doxycycline (Dox) and performed qPCR for selected  
330 KSHV genes. We observed induction of KSHV lytic genes, PAN RNA, ORF6, vIRF-1  
331 and vIRF-4 (**Figure 2A**). In addition, we verified induction of selected lytic KSHV

332 proteins at 48h (**Figure 2B**), and virion production in culture supernatant at 96 h post-  
333 reactivation. Finally, culture supernatant was also used to infect A549 recipient cells to  
334 verify infectivity (**Figure 2C**). Altogether, these observations indicate that 3xFlag-mini-  
335 TurboID protein tag did not interfere with viral gene expression and that the recombinant  
336 KSHVs are replicating to produce infectious viral particles.

337

338 **Proximity biotin labelling with vIRF-1 and vIRF-4.** For proximity protein labeling,  
339 three replicated samples were prepared for both vIRF-1 and vIRF-4 mini-TurboID cells.  
340 Cells were reactivated with Doxycycline and NaB (sodium butyrate) for 24 h followed by  
341 addition of biotin for 1 h. Two sets of controls were also processed concurrently, in order  
342 to rule out non-specific precipitations. In the first set, the cells were left without triggering  
343 reactivation followed by incubation with biotin (+B) to rule out non-specific protein  
344 binding with biotin (Ctrl 1). For the second set, cells were reactivated with Dox/TPA for  
345 24 h and incubated for additional 1 h in the absence of biotin (-B) to rule out non-  
346 specific interaction with streptavidin beads (Ctrl 2). Schematic workflow for the  
347 experiment is presented in **Figure 3A**. We confirmed the biotinylation signal by  
348 streptavidin blot, and vIRF-1 and vIRF-4 expression by using anti-Flag antibody (**Figure**  
349 **3B**). The whole cell lysate from vIRF-1 and vIRF-4 mini-TurboID cells were further used  
350 for enrichment of biotinylated protein using magnetic beads coated with streptavidin.  
351 The enriched proteins were eluted from the streptavidin beads using trypsin on-bead  
352 digestion overnight. Ctrl1 and ctrl2 were used independently to remove background  
353 noise. We designated proteins with p-value <0.05 and fold change > 2 over both ctrl1



354 and ctrl2 as positive hits. Based on our setting, we identified 213 and 70 proteins from  
355 vIRF-1 and vIRF-4 mini-TurboID cells respectively (**S-Table 1, S-Table 2**).

356

### 357 **vIRF-1 and vIRF-4 pathway analysis.**

358 Next, gene ontology (GO) analysis was performed for proteins identified in vIRF-1 and  
359 vIRF-4 mini-TurboID cells. The vIRF-1 interactome revealed significant enrichment for  
360 functions related to mRNA processing, transcription regulation by TP53, regulation of  
361 mRNA processing, and formation of RNA pol II elongation complex. Top 20 enriched  
362 GO terms are presented in **Figure 4A** (upper panel). Similarly, GO analysis for the  
363 vIRF-4 revealed again enrichment of mRNA processing, regulation of mRNA processing,  
364 mRNA polyadenylation, and mRNA splicing [**Figure 4A** (lower panel)]. Consistent with  
365 the fact that vIRF-1 and vIRF-4 have overlapping biological functions, we found  
366 overlapping possible pathway regulations in vIRF-1 and vIRF-4. Network plot by  
367 Cytoscape was generated using a subset of enriched proteins to highlight their  
368 respective protein networks (**Figure 4B**).

369

### 370 **Effects of common hits in KSHV replication.**

371 Previous studies demonstrated that vIRF-1 and vIRF-4 possess similar biological  
372 functions to regulate interferon pathways (18, 20). We thus hypothesize that commonly  
373 targeted cellular proteins by the two viral proteins play an important role in interferon  
374 responses. Our venn diagram indicated 123 and 23 proteins were interacting  
375 exclusively with vIRF-1 and vIRF-4, respectively, and 47 proteins were found to be  
376 interacting with both vIRF-1 and vIRF-4. This suggests that the majority of vIRF-4

377 interacting proteins (67%) are also neighbors to vIRF-1 (**Figure 5A**). Of the 47 proteins  
378 interacting with both vIRF-1 and vIRF-4, 44 were cellular proteins whereas 3 were viral  
379 proteins (**Figure 5A**). To examine the role of those cellular proteins in KSHV replication,  
380 iSLK.219 cell line was employed. iSLK.219 carries a recombinant rKSHV.219 virus  
381 encoding a constitutively expressing GFP and an PAN RNA promoter driven RFP  
382 reporter in the viral genome, allowing us to monitor the lytic promoter activation. We  
383 used siRNA to knock-down these 44 cellular proteins followed by KSHV reactivation by  
384 treatment with Dox to induce K-Rta expression. We found that knock-down of 17 genes  
385 enhanced KSHV promoter activation, while knock-down of 6 genes lowered KSHV gene  
386 transactivation (**Figure 5B**). The corresponding images of selected knock-down  
387 experiments are shown in **Figure 5C**, and the results were further confirmed by  
388 quantifying the viral mRNAs after knock-down of selected genes, SF3B1, SF3B2 and  
389 SNW1 (**Figure 5D**). Consistent with increased viral gene expression, the viral DNA copy  
390 number in culture supernatant was increased by knocking-down of SF3B1, SF3B2 or  
391 SNW1 (**Figure 5E**). Taken together, our study suggests that some splicing factors have  
392 a role in restricting KSHV gene expression during reactivation, albeit their biological  
393 roles in general host gene transcription.

394

### 395 **Splicing factor 3B (SF3B) subunits are important for IFN gene expression.**

396 Previous reports showed that the KSHV genome is sensed by RIG-I like receptors.  
397 PolyI:C is a synthetic dsRNA polymer which is recognized by RIG-I, leading to strong  
398 induction of interferons and interferon stimulatory genes (ISGs). Because KSHV vIRFs  
399 are known counteract IFN responses, we examined the relation of SF3B1 and SNW1 to

400 interferon responses with polyI:C. The results showed that knock-down of SF3B1 or  
401 SNW1 clearly inhibited induction of type I interferon (IFNB1), type III interferon (IFNL1),  
402 and interferon downstream target gene (DDX58) [Figure 6 (a-c)], but not the non-IFN  
403 regulatory gene [Figure 6(d)].

404

## 405 Discussion

406 Since viral replication depends entirely upon host factors, understand the virus and host  
407 protein interaction network is important to find their Achilles's heel (46). We therefore  
408 applied a mini-TurboID based system for studying the virus and host protein interaction.  
409 By constructing mini-TurboID as an integral component of KSHV BAC16 recombination  
410 system, we demonstrated a novel approach to define protein interaction networks. We  
411 propose that this approach increases the reproducibility of identifying interacting  
412 proteins, because tight interaction between biotin and streptavidin allows us to wash  
413 magnetic beads in highly stringent conditions to remove non-specific or indirect protein  
414 interactions. High reproducibility could be seen in our biological triplicated samples (S-  
415 Fig. 1).

416 To conveniently generate mini-TurboID tagged viruses, we first generated  
417 template plasmids similar to what we did for Rainbow-KSHV (47). With a plasmid  
418 template, homology arms can be added to primer pairs and the resultant PCR product is  
419 used for recombination (Fig. 1A). Background BAC16 can also be wild type BAC16,  
420 mutant virus, and/or Rainbow-KSHV, which allows us to examine the formation of  
421 protein complexes during viral replication and the effects of specific mutations. In this  
422 study, we used vIRF-1 and vIRF-4 as bait for validating the efficiency of PL. The vIRF-1

423 and vIRF-4 were selected because of their known role in regulation of innate immune  
424 response during KSHV reactivation, and multiple interacting proteins have been  
425 identified that can be used as comparisons (18, 23, 26, 48). Consistent with previous  
426 studies, vIRF-1 and vIRF-4 were found to be physically neighboring to cellular proteins  
427 that function in p53 transcriptional regulation. vIRF-1 was reported to deregulate p53  
428 activity by interacting with ATM kinase and prevent serine 15 phosphorylation (49). In  
429 addition, vIRF-1 interacts directly with p53 to inhibit its transcriptional activation (48).  
430 Although our studies could not precipitate p53, we identified p53BP1 (p53 binding  
431 protein 1) as a possible partner of vIRF-1. We could also identify USP7 in both vIRF-1  
432 and vIRF-4 samples, validating the PL approaches (23).

433         After learning that mini-Turbo worked efficiently in biotinylating cellular proteins,  
434 we tagged various other KSHV genes with mini-TurboID using the same approach.  
435 However, we learned that efficacies of biotin labeling varies significantly among different  
436 viral proteins. For example, mini-Turbo-ORF57 robustly induced biotinylated protein in  
437 total lysates with as little as 15 min of D-biotin incubation, while biotinylation by mini-  
438 Turbo-ORF50 was barely detectable in the same time frame. For this study, we also  
439 generated vIRF-2 and vIRF-3 constructs at same time; however, the level of  
440 biotinylation was lower with the same amount of D-biotin and incubation periods,  
441 leading us to drop these analyses for comparison. Differences in efficacy of biotinylation  
442 have also been seen in prior studies and abundance of viral protein expression during  
443 reactivation and subcellular nuclear localization seemed to have strong effects in the  
444 outcome of biotinylation.

445 Our PL studies showed a large portion of host proteins (36%) were related to  
446 mRNA processing. Within these RNA processing proteins, SF3B1, SF3B2 and SF3B3,  
447 a component of SF3b complex, were clear front runners for our further analyses. The  
448 SF3b complex is a component of the functional U2 small nuclear ribonucleoprotein  
449 (snRNP), which recognizes the exon/intron junctions and facilitates spliceosome  
450 assembly (50). Even though SF3B1 is one of many cellular genes involved in RNA  
451 splicing, *SF3B1* has been specifically identified as a commonly mutated gene in  
452 myelodysplastic syndrome (MDS) at 25–30% frequencies in MDS patients (51-53).  
453 Recent studies also showed that SF3B1 mutations increase R-loop formation and DNA  
454 damage (54). Here we found SF3B1 knock-down inhibited IFN gene expression 3 to 4-  
455 fold and also enhanced KSHV reactivation. In fact, SF3A1 and SF3B1 were reported to  
456 play a role in innate immune response to TLR ligands. The study showed that SF3A1  
457 and SF3B1 are necessary to increase production of IL-6 and IFN $\beta$  by modulating the  
458 splicing of MyD88, an important adaptor molecule for TLR signaling pathway (55).  
459 Based on that study and ours, we propose that targeting the splicing complex might be  
460 a previously uncharacterized mechanism for KSHV to modulate host immune responses.  
461 Further studies on regulation of SF3B complex formation during KSHV reactivation  
462 and/or IFN stimulation with PL will clarify underlying mechanisms of SF3B family  
463 proteins in KSHV replication and IFN regulation.

464 In addition to SF3 complex, several other mRNA processing factors like XAB2,  
465 SNRPD1, SNW1, RBM10, SYMPK, and GTF2F2 were found to suppress KSHV  
466 reactivation (Fig 5). A recent study showed that SNW1 interacts with IKK $\gamma$ , the  
467 regulatory subunit of I $\kappa$ B kinase (IKK) complex. SNW1 increases production of IL-6,

468 IFN $\beta$ , and MX1 by enhanced activation of NF- $\kappa$ B and phosphorylation of TBK1 in  
469 response to influenza A virus and polyI:C (56). Influenza A virus and polyI:C are  
470 recognized by the innate immune sensor RIG-I, which plays an important role in  
471 suppressing KSHV reactivation by sensing KSHV DNA (11, 12, 57, 58). Accordingly, we  
472 explored the role of SNW1 in regulating RIG-I mediated innate immune response during  
473 KSHV reactivation. We found that knock-down SNW1 indeed enhanced KSHV  
474 replication (Fig. 5D), and this effect could be through down-regulation of IFN $\beta$  (Fig. 6).

475 In summary, using mini-TurboID KSHV with vIRFs as bait, we could successfully  
476 probe cellular proteins that play a role in innate immune responses. We propose mini-  
477 TurboID with recombinant KSHV BAC system as a very powerful combination to identify  
478 cellular proteins that play an important role in KSHV replication, hence a key player for  
479 respective cellular pathways.

480

## 481 **Acknowledgement**

482 We would like to thank all members in Izumiya lab for valuable discussion and  
483 assistances. This research was supported by public health grants from National Cancer  
484 Institute (CA225266, CA232845), National Institute of Dental and Craniofacial  
485 (DE025985), and National Institute of Allergy and Infectious Disease (AI147207) to Y.I.

486

487 **Figure Legends**

488 **Figure 1. Engineering of mini-TurboID KSHVs. (A) Schematic diagram for**  
489 **construction of 3xFlag-miniTurboID-K9 and 3xFlag-miniTurboID-K10 KSHV**  
490 **BAC16.** (i) The codon optimized cDNA fragment (900 bp) of mini-TurboID was  
491 synthesized and cloned into pBS vector between KpnI and SacII restriction enzyme  
492 sites. (ii) The kanamycin cassette with I-SceI recognition sequence along with 50 bp  
493 homologous sequence was generated by PCR with pEP-Kan plasmid as a template,  
494 and cloned into *AccI* restriction enzyme site. (iii-v) The resulting plasmid was fully  
495 sequenced and used as a template to generate a DNA fragment for homologous  
496 recombination with BAC16 inside bacteria. (vi, vii) After confirmation of insertion at  
497 correct site by colony PCR screening, the kanamycin cassette was deleted by  
498 recombination with induction of I-SceI in bacteria by incubating with L-Arabinose.  
499 Correct insertion of the mini-TurboID and integrity of BAC DNA were confirmed by  
500 sequencing of PCR-amplified fragments and restriction digestions. Primers and DNA  
501 fragment used are listed in Table 1. **(B) Generation of vIRF-1 and vIRF-4 TurboID**  
502 **stable cells.** iSLK cells were transfected with 3xFlag-miniTurboID-K9 and 3xFlag-  
503 miniTurboID-K10 KSHV BAC16 and stably selected with hygromycin (1 mg/ml). GFP  
504 images show iSLK latently infected with 3xFlag-miniTurboID-K9 (upper panels) and  
505 3xFlag-miniTurboID-K10 KSHV BAC16 (lower panels). BF: Bright Field, GFP: Green  
506 fluorescent protein. **(C) Biotin ligase activity of mini-TurboID tagged vIRF-1 and**  
507 **vIRF-4.** The vIRF-1 and vIRF-4 mini-TurboID cells were stimulated with Dox (1µg/ml)  
508 and NaB (3 mM) for 24h followed by incubation with indicated concentration of D-biotin  
509 for 1h. Activity of mini-TurboID was examined by immunoblot using Streptavidin HRP

510 conjugate. WB: Western Blot. **(D) Dependency of mini-TurboID on labelling time.**  
511 vIRF-1-Turbo and vIRF-4 mini-TurboID cells were stimulated with Dox (1 µg/ml) and  
512 NaB (3 mM) for 24 h followed by incubation with D-biotin (500 µM) for indicated time-  
513 points. Activity of mini-TurboID was analyzed by immunoblot using Streptavidin HRP  
514 conjugate. WB: Western Blot, m: minutes, h: hours.

515

516 **Figure 2. Viral gene expression and production of progeny virus. (A) Viral gene**  
517 **expression for vIRF-1 and vIRF-4 mini-TurboID cells.** The vIRF-1 and vIRF-4 mini-  
518 TurboID cells were stimulated with Dox (1 µg/ml) for 24 and 48 h. Total RNA was  
519 purified at indicated time point and subjected to real-time PCR for indicated genes.  
520 Gene expression is shown as a  $2^{-\Delta CT}$ . 18S ribosomal RNA was used as an internal  
521 standard for normalization. **(B) Viral protein expression in vIRF-1 and vIRF-4 mini-**  
522 **TurboID cells.** The vIRF-1 and vIRF-4 mini-TurboID cells were stimulated with Dox (1  
523 µg/ml) and NaB (3 mM) for 24 h. Total cell lysates were subjected to immunoblotting  
524 using KSHV proteins and β-actin protein specific antibodies. **(C) De novo infection.**  
525 A549 cells were infected with vIRF-1 and vIRF-4 mini-TurboID virus. BF: Bright field,  
526 GFP: Green fluorescent protein.

527

528 **Figure 3. Proteins in close-proximity to vIRF-1 and vIRF-4. (A) Schematic**  
529 **workflow for experimental setup.** Three biological replicates for each sample were  
530 analyzed by LC-MS/MS analysis. The plus (+) and minus (-) signs indicate presence  
531 and absence, respectively. Ctrl: Control, Expt: Experimental, D/N: Dox (1 µg/ml) and  
532 NaB (3 mM). **(B) Confirmation of biotinylation.** The cell lysate from one of the three



533 biological replicates was subjected to immunoblotting using streptavidin HRP  
534 conjugates, Flag antibody and  $\beta$ -actin antibody. WB: Western Blotting. **(C-D)**  
535 **Identification of proteins in close proximity to vIRF-1 and vIRF-4.** Volcano plot  
536 showing differential proteins profiles in Ctrl 1 and Expt, and Ctrl 2 and Expt for vIRF-1  
537 **(C)** and vIRF-4 mini-TurboID expressing cells **(D)**. Identified and quantified biotinylated  
538 peptides are plotted as log<sub>2</sub> fold change (Expt/Ctrl1) or (Expt/Ctrl2) versus -log<sub>10</sub> p-  
539 value. Biotinylated peptide for vIRF-1 **(C)** and vIRF-4 **(D)** are shown with red arrow.  
540 Yellow boxes indicate selected peptides with fold change > 2 and p value < 0.05. **(E)**  
541 Venn diagram comparing proteomic lists between Ctrl1 vs Expt and Ctrl2 vs Expt (left  
542 panel for vIRF-1 and right panel for vIRF-4).

543

544 **Figure 4. Pathway analysis for vIRF-1 and vIRF-4 interacting protein. (A)** Top non-  
545 redundant enrichment clusters for vIRF-1 (top panel) and vIRF-4 (bottom panel)  
546 interacting proteins using Metascape bar graph (30944313). Color scales represent  
547 statistical significance. **(B)** Metascape enrichment network visualization for vIRF-1 (top  
548 panel) and vIRF-4 (bottom panel) showing the intra-cluster and inter-cluster similarities  
549 of enriched terms, up to ten terms per cluster. Cluster annotations are shown in color  
550 code.

551

552 **Figure 5. Splicing factor 3B (SF3B) subunits are suppressors for KSHV**  
553 **reactivation. (A) Common protein between vIRF-1 and vIRF-4.** Venn diagram  
554 depicting proteins that interact with vIRF-1 and vIRF-4. List of cellular proteins and viral  
555 protein interacting with vIRF-1 and vIRF-4. **(B) KSHV reactivation.** Five pmol of

556 individual siRNAs were transfected into iSLK.r219 cells for 48 h followed by reactivation  
557 with Dox (1  $\mu$ g/ml) for 24 h. Percentage RFP signal was quantified relative to the non-  
558 targeting control siRNA (NTC). \* $p \leq 0.05$ , \*\* $p \leq 0.01$ , \*\*\* $p \leq 0.001$  and \*\*\*\* $p \leq 0.0001$ .

559 **(C) Microscopy imaging.** Representative RFP microscopy images of Fig 5B. **(D)**

560 **Quantification of viral gene expression.** Five pmol of siC, siSF3B2 and siSNW1 were  
561 transfected in iSLK.r219 cells for 48h followed by reactivation with Dox (1  $\mu$ g/ml) for 24  
562 h. PAN RNA, ORF6 and LANA gene expression was quantified using real-time PCR.  
563 \*\*\* $p \leq 0.001$  and \*\*\*\* $p \leq 0.0001$ . **(E) Quantification of progeny virus.** Five pmol of siC,

564 siSF3B2 and siSNW1 were transfected in iSLK.r219 cells for 48 h followed by  
565 reactivation with Dox (1  $\mu$ g/ml) for 24 h. Viral copy number was quantified from tissue  
566 culture supernatant using real-time PCR. \*\*\* $p \leq 0.001$  and \*\*\*\* $p \leq 0.0001$ .

567

568 **Figure 6. Splicing factor 3B (SF3B1) and SNW1 are suppressors for IFNB1**  
569 **transcription.** Five pmol of siC, siSF3B1 or siSNW1 was transfected into 293FT cells  
570 for 48 h, followed by polyI:C transfection. Twenty-four post transfection of poly:C, total  
571 RNA was harvested and measured IFN-related (a) IFN $\beta$ 1, (b) IFN $\lambda$  and (c) DDX58, or  
572 non-related (d) DDX23 mRNAs. \*\*\* $p \leq 0.001$  and \*\*\*\* $p \leq 0.0001$ .

573

574 **References**

- 575 1. **Chang Y, Cesarman E, Pessin MS, Lee F, Culpepper J, Knowles DM, Moore PS.**  
576 1994. Identification of herpesvirus-like DNA sequences in AIDS-associated Kaposi's  
577 sarcoma. *Science* **266**:1865-1869.
- 578 2. **Mesri EA, Cesarman E, Boshoff C.** 2010. Kaposi's sarcoma and its associated  
579 herpesvirus. *Nat Rev Cancer* **10**:707-719.
- 580 3. **Schulz TF.** 2006. The pleiotropic effects of Kaposi's sarcoma herpesvirus. *J Pathol*  
581 **208**:187-198.
- 582 4. **Wong EL, Damania B.** 2005. Linking KSHV to human cancer. *Curr Oncol Rep* **7**:349-  
583 356.
- 584 5. **Cesarman E, Moore PS, Rao PH, Inghirami G, Knowles DM, Chang Y.** 1995. In  
585 vitro establishment and characterization of two acquired immunodeficiency syndrome-  
586 related lymphoma cell lines (BC-1 and BC-2) containing Kaposi's sarcoma-associated  
587 herpesvirus-like (KSHV) DNA sequences. *Blood* **86**:2708-2714.
- 588 6. **Cesarman E, Knowles DM.** 1999. The role of Kaposi's sarcoma-associated herpesvirus  
589 (KSHV/HHV-8) in lymphoproliferative diseases. *Semin Cancer Biol* **9**:165-174.
- 590 7. **Broussard G, Damania B.** 2019. KSHV: Immune Modulation and Immunotherapy.  
591 *Front Immunol* **10**:3084.
- 592 8. **Kerur N, Veettil MV, Sharma-Walia N, Bottero V, Sadagopan S, Otageri P,**  
593 **Chandran B.** 2011. IFI16 acts as a nuclear pathogen sensor to induce the inflammasome  
594 in response to Kaposi Sarcoma-associated herpesvirus infection. *Cell Host Microbe*  
595 **9**:363-375.
- 596 9. **Singh VV, Kerur N, Bottero V, Dutta S, Chakraborty S, Ansari MA, Paudel N,**  
597 **Chikoti L, Chandran B.** 2013. Kaposi's sarcoma-associated herpesvirus latency in  
598 endothelial and B cells activates gamma interferon-inducible protein 16-mediated  
599 inflammasomes. *J Virol* **87**:4417-4431.
- 600 10. **Inn KS, Lee SH, Rathbun JY, Wong LY, Toth Z, Machida K, Ou JH, Jung JU.** 2011.  
601 Inhibition of RIG-I-mediated signaling by Kaposi's sarcoma-associated herpesvirus-  
602 encoded deubiquitinase ORF64. *J Virol* **85**:10899-10904.
- 603 11. **Zhang Y, Dittmer DP, Mieczkowski PA, Host KM, Fusco WG, Duncan JA,**  
604 **Damania B.** 2018. RIG-I Detects Kaposi's Sarcoma-Associated Herpesvirus Transcripts  
605 in a RNA Polymerase III-Independent Manner. *mBio* **9**.
- 606 12. **Zhao Y, Ye X, Dunker W, Song Y, Karijolich J.** 2018. RIG-I like receptor sensing of  
607 host RNAs facilitates the cell-intrinsic immune response to KSHV infection. *Nat*  
608 *Commun* **9**:4841.
- 609 13. **West JA, Gregory SM, Sivaraman V, Su L, Damania B.** 2011. Activation of  
610 plasmacytoid dendritic cells by Kaposi's sarcoma-associated herpesvirus. *J Virol* **85**:895-  
611 904.
- 612 14. **West J, Damania B.** 2008. Upregulation of the TLR3 pathway by Kaposi's sarcoma-  
613 associated herpesvirus during primary infection. *J Virol* **82**:5440-5449.
- 614 15. **Lagos D, Vart RJ, Gratrix F, Westrop SJ, Emuss V, Wong PP, Robey R, Imami N,**  
615 **Bower M, Gotch F, Boshoff C.** 2008. Toll-like receptor 4 mediates innate immunity to  
616 Kaposi sarcoma herpesvirus. *Cell Host Microbe* **4**:470-483.

- 617 16. **Gregory SM, Davis BK, West JA, Taxman DJ, Matsuzawa S, Reed JC, Ting JP,**  
618 **Damania B.** 2011. Discovery of a viral NLR homolog that inhibits the inflammasome.  
619 *Science* **331**:330-334.
- 620 17. **Myoung J, Lee SA, Lee HR.** 2019. Beyond Viral Interferon Regulatory Factors:  
621 Immune Evasion Strategies. *J Microbiol Biotechnol* **29**:1873-1881.
- 622 18. **Lee HR, Kim MH, Lee JS, Liang C, Jung JU.** 2009. Viral interferon regulatory factors.  
623 *J Interferon Cytokine Res* **29**:621-627.
- 624 19. **Takaoka A, Tamura T, Taniguchi T.** 2008. Interferon regulatory factor family of  
625 transcription factors and regulation of oncogenesis. *Cancer Sci* **99**:467-478.
- 626 20. **Jacobs SR, Damania B.** 2011. The viral interferon regulatory factors of KSHV:  
627 immunosuppressors or oncogenes? *Front Immunol* **2**:19.
- 628 21. **Burysek L, Yeow WS, Lubyova B, Kellum M, Schafer SL, Huang YQ, Pitha PM.**  
629 1999. Functional analysis of human herpesvirus 8-encoded viral interferon regulatory  
630 factor 1 and its association with cellular interferon regulatory factors and p300. *J Virol*  
631 **73**:7334-7342.
- 632 22. **Li M, Damania B, Alvarez X, Ogryzko V, Ozato K, Jung JU.** 2000. Inhibition of p300  
633 histone acetyltransferase by viral interferon regulatory factor. *Mol Cell Biol* **20**:8254-  
634 8263.
- 635 23. **Xiang Q, Ju H, Li Q, Mei SC, Chen D, Choi YB, Nicholas J.** 2018. Human  
636 Herpesvirus 8 Interferon Regulatory Factors 1 and 3 Mediate Replication and Latency  
637 Activities via Interactions with USP7 Deubiquitinase. *J Virol* **92**.
- 638 24. **Koch S, Damas M, Freise A, Hage E, Dhingra A, Ruckert J, Gallo A, Kremmer E,**  
639 **Tegge W, Bronstrup M, Brune W, Schulz TF.** 2019. Kaposi's sarcoma-associated  
640 herpesvirus vIRF2 protein utilizes an IFN-dependent pathway to regulate viral early gene  
641 expression. *PLoS Pathog* **15**:e1007743.
- 642 25. **Yu HR, Kim YJ, Lee HR.** 2018. KSHV vIRF4 enhances BCL6 transcription via  
643 downregulation of IRF4 expression. *Biochem Biophys Res Commun* **496**:1128-1133.
- 644 26. **Hwang SW, Kim D, Jung JU, Lee HR.** 2017. KSHV-encoded viral interferon  
645 regulatory factor 4 (vIRF4) interacts with IRF7 and inhibits interferon alpha production.  
646 *Biochem Biophys Res Commun* **486**:700-705.
- 647 27. **Roux KJ, Kim DI, Raida M, Burke B.** 2012. A promiscuous biotin ligase fusion protein  
648 identifies proximal and interacting proteins in mammalian cells. *J Cell Biol* **196**:801-810.
- 649 28. **Branon TC, Bosch JA, Sanchez AD, Udeshi ND, Svinkina T, Carr SA, Feldman JL,**  
650 **Perrimon N, Ting AY.** 2018. Efficient proximity labeling in living cells and organisms  
651 with TurboID. *Nat Biotechnol* **36**:880-887.
- 652 29. **Motani K, Kosako H.** 2020. BioID screening of biotinylation sites using the avidin-like  
653 protein Tamavidin 2-REV identifies global interactors of stimulator of interferon genes  
654 (STING). *J Biol Chem* **295**:11174-11183.
- 655 30. **Bozal-Basterra L, Gonzalez-Santamarta M, Muratore V, Bermejo-Arteagabeitia A,**  
656 **Da Fonseca C, Barroso-Gomila O, Azkargorta M, Iloro I, Pampliega O, Andrade R,**  
657 **Martin-Martin N, Branon TC, Ting AY, Rodriguez JA, Carracedo A, Elortza F,**  
658 **Sutherland JD, Barrio R.** 2020. LUZP1, a novel regulator of primary cilia and the actin  
659 cytoskeleton, is a contributing factor in Townes-Brocks Syndrome. *Elife* **9**.
- 660 31. **Cho KF, Branon TC, Rajeev S, Svinkina T, Udeshi ND, Thoudam T, Kwak C, Rhee**  
661 **HW, Lee IK, Carr SA, Ting AY.** 2020. Split-TurboID enables contact-dependent  
662 proximity labeling in cells. *Proc Natl Acad Sci U S A* **117**:12143-12154.

- 663 32. **May DG, Scott KL, Campos AR, Roux KJ.** 2020. Comparative Application of BioID  
664 and TurboID for Protein-Proximity Biotinylation. *Cells* **9**.
- 665 33. **Shinoda N, Hanawa N, Chihara T, Koto A, Miura M.** 2019. Dronc-independent basal  
666 executioner caspase activity sustains *Drosophila* imaginal tissue growth. *Proc Natl Acad*  
667 *Sci U S A* **116**:20539-20544.
- 668 34. **Mair A, Xu SL, Branon TC, Ting AY, Bergmann DC.** 2019. Proximity labeling of  
669 protein complexes and cell-type-specific organellar proteomes in *Arabidopsis* enabled by  
670 TurboID. *Elife* **8**.
- 671 35. **Zhang Y, Song G, Lal NK, Nagalakshmi U, Li Y, Zheng W, Huang PJ, Branon TC,**  
672 **Ting AY, Walley JW, Dinesh-Kumar SP.** 2019. TurboID-based proximity labeling  
673 reveals that UBR7 is a regulator of N NLR immune receptor-mediated immunity. *Nat*  
674 *Commun* **10**:3252.
- 675 36. **Arora D, Abel NB, Liu C, Van Damme P, Yperman K, Eeckhout D, Vu LD, Wang J,**  
676 **Tornkvist A, Impens F, Korbei B, Van Leene J, Goossens A, De Jaeger G, Ott T,**  
677 **Moschou PN, Van Damme D.** 2020. Establishment of Proximity-dependent  
678 Biotinylation Approaches in Different Plant Model Systems. *Plant Cell*  
679 doi:10.1105/tpc.20.00235.
- 680 37. **Zhang Y, Li Y, Yang X, Wen Z, Nagalakshmi U, Dinesh-Kumar SP.** 2020. TurboID-  
681 Based Proximity Labeling for In Planta Identification of Protein-Protein Interaction  
682 Networks. *J Vis Exp* doi:10.3791/60728.
- 683 38. **Larochelle M, Bergeron D, Arcand B, Bachand F.** 2019. Proximity-dependent  
684 biotinylation mediated by TurboID to identify protein-protein interaction networks in  
685 yeast. *J Cell Sci* **132**.
- 686 39. **Izumiya Y, Izumiya C, Van Geelen A, Wang DH, Lam KS, Luciw PA, Kung HJ.**  
687 2007. Kaposi's sarcoma-associated herpesvirus-encoded protein kinase and its interaction  
688 with K-bZIP. *J Virol* **81**:1072-1082.
- 689 40. **Tischer BK, Smith GA, Osterrieder N.** 2010. En passant mutagenesis: a two step  
690 markerless red recombination system. *Methods Mol Biol* **634**:421-430.
- 691 41. **Brulois KF, Chang H, Lee AS, Ensser A, Wong LY, Toth Z, Lee SH, Lee HR,**  
692 **Myoung J, Ganem D, Oh TK, Kim JF, Gao SJ, Jung JU.** 2012. Construction and  
693 manipulation of a new Kaposi's sarcoma-associated herpesvirus bacterial artificial  
694 chromosome clone. *J Virol* **86**:9708-9720.
- 695 42. **Izumiya Y, Izumiya C, Hsia D, Ellison TJ, Luciw PA, Kung HJ.** 2009. NF-kappaB  
696 serves as a cellular sensor of Kaposi's sarcoma-associated herpesvirus latency and  
697 negatively regulates K-Rta by antagonizing the RBP-Jkappa coactivator. *J Virol* **83**:4435-  
698 4446.
- 699 43. **Fakhari FD, Dittmer DP.** 2002. Charting latency transcripts in Kaposi's sarcoma-  
700 associated herpesvirus by whole-genome real-time quantitative PCR. *J Virol* **76**:6213-  
701 6223.
- 702 44. **Nesvizhskii AI, Keller A, Kolker E, Aebersold R.** 2003. A statistical model for  
703 identifying proteins by tandem mass spectrometry. *Anal Chem* **75**:4646-4658.
- 704 45. **Zhou Y, Zhou B, Pache L, Chang M, Khodabakhshi AH, Tanaseichuk O, Benner C,**  
705 **Chanda SK.** 2019. Metascape provides a biologist-oriented resource for the analysis of  
706 systems-level datasets. *Nat Commun* **10**:1523.
- 707 46. **Goodacre N, Devkota P, Bae E, Wuchty S, Uetz P.** 2020. Protein-protein interactions  
708 of human viruses. *Semin Cell Dev Biol* **99**:31-39.



- 709 47. **Nakajima KI, Guevara-Plunkett S, Chuang F, Wang KH, Lyu Y, Kumar A,**  
710 **Luxardi G, Izumiya C, Soulika A, Campbell M, Izumiya Y.** 2020. Rainbow Kaposi's  
711 Sarcoma-Associated Herpesvirus Revealed Heterogenic Replication with Dynamic Gene  
712 Expression. *J Virol* **94**.
- 713 48. **Seo T, Park J, Lee D, Hwang SG, Choe J.** 2001. Viral interferon regulatory factor 1 of  
714 Kaposi's sarcoma-associated herpesvirus binds to p53 and represses p53-dependent  
715 transcription and apoptosis. *J Virol* **75**:6193-6198.
- 716 49. **Shin YC, Nakamura H, Liang X, Feng P, Chang H, Kowalik TF, Jung JU.** 2006.  
717 Inhibition of the ATM/p53 signal transduction pathway by Kaposi's sarcoma-associated  
718 herpesvirus interferon regulatory factor 1. *J Virol* **80**:2257-2266.
- 719 50. **Sun C.** 2020. The SF3b complex: splicing and beyond. *Cell Mol Life Sci* **77**:3583-3595.
- 720 51. **Malcovati L, Papaemmanuil E, Bowen DT, Boulwood J, Della Porta MG, Pascutto**  
721 **C, Travaglino E, Groves MJ, Godfrey AL, Ambaglio I, Galli A, Da Via MC, Conte S,**  
722 **Tauro S, Keenan N, Hyslop A, Hinton J, Mudie LJ, Wainscoat JS, Futreal PA,**  
723 **Stratton MR, Campbell PJ, Hellstrom-Lindberg E, Cazzola M, Chronic Myeloid**  
724 **Disorders Working Group of the International Cancer Genome C, of the**  
725 **Associazione Italiana per la Ricerca sul Cancro Gruppo Italiano Malattie M.** 2011.  
726 Clinical significance of SF3B1 mutations in myelodysplastic syndromes and  
727 myelodysplastic/myeloproliferative neoplasms. *Blood* **118**:6239-6246.
- 728 52. **Dolatshad H, Pellagatti A, Liberante FG, Llorian M, Repapi E, Steeples V, Roy S,**  
729 **Scifo L, Armstrong RN, Shaw J, Yip BH, Killick S, Kusec R, Taylor S, Mills KI,**  
730 **Savage KI, Smith CWJ, Boulwood J.** 2016. Cryptic splicing events in the iron  
731 transporter ABCB7 and other key target genes in SF3B1-mutant myelodysplastic  
732 syndromes. *Leukemia* **30**:2322-2331.
- 733 53. **Papaemmanuil E, Cazzola M, Boulwood J, Malcovati L, Vyas P, Bowen D,**  
734 **Pellagatti A, Wainscoat JS, Hellstrom-Lindberg E, Gambacorti-Passerini C,**  
735 **Godfrey AL, Rapado I, Cvejic A, Rance R, McGee C, Ellis P, Mudie LJ, Stephens**  
736 **PJ, McLaren S, Massie CE, Tarpey PS, Varela I, Nik-Zainal S, Davies HR, Shlien A,**  
737 **Jones D, Raine K, Hinton J, Butler AP, Teague JW, Baxter EJ, Score J, Galli A,**  
738 **Della Porta MG, Travaglino E, Groves M, Tauro S, Munshi NC, Anderson KC, El-**  
739 **Naggar A, Fischer A, Mustonen V, Warren AJ, Cross NCP, Green AR, Futreal PA,**  
740 **Stratton MR, Campbell PJ, Consortium ICG.** 2011. Somatic SF3B1 Mutation in  
741 Myelodysplasia with Ring Sideroblasts. *New England Journal of Medicine* **365**:1384-  
742 1395.
- 743 54. **Singh S, Ahmed D, Dolatshad H, Tatwavedi D, Schulze U, Sanchi A, Ryley S, Dhir**  
744 **A, Carpenter L, Watt SM, Roberts DJ, Abdel-Aal AM, Sayed SK, Mohamed SA,**  
745 **Schuh A, Vyas P, Killick S, Kotini AG, Papapetrou EP, Wiseman DH, Pellagatti A,**  
746 **Boulwood J.** 2020. SF3B1 mutations induce R-loop accumulation and DNA damage in  
747 MDS and leukemia cells with therapeutic implications. *Leukemia* **34**:2525-2530.
- 748 55. **De Arras L, Alper S.** 2013. Limiting of the innate immune response by SF3A-dependent  
749 control of MyD88 alternative mRNA splicing. *PLoS Genet* **9**:e1003855.
- 750 56. **Zhang Q, Liang T, Gu S, Ye Y, Liu S.** 2020. SNW1 interacts with IKKgamma to  
751 positively regulate antiviral innate immune responses against influenza A virus infection.  
752 *Microbes Infect* doi:10.1016/j.micinf.2020.07.009.
- 753 57. **Zhang H, Ni G, Damania B.** 2020. ADAR1 Facilitates KSHV Lytic Reactivation by  
754 Modulating the RLR-Dependent Signaling Pathway. *Cell Rep* **31**:107564.

755 58. **Gupta S, Yla-Anttila P, Sandalova T, Achour A, Masucci MG.** 2020. Interaction With  
756 14-3-3 Correlates With Inactivation of the RIG-I Signalosome by Herpesvirus Ubiquitin  
757 Deconjugases. *Front Immunol* **11**:437.  
758

759

760 **Table 1. Primers, Plasmid, and Gene block DNA sequence used for BAC16 recombination**  
 761 **(5'->3')**

|                                                                                                                                 |                                                                                                                                                                                                                                                                                                                                                                                                                                                                                                                                                                                                                                                                                                                                                                                                                                                                                                                                                                                                      |
|---------------------------------------------------------------------------------------------------------------------------------|------------------------------------------------------------------------------------------------------------------------------------------------------------------------------------------------------------------------------------------------------------------------------------------------------------------------------------------------------------------------------------------------------------------------------------------------------------------------------------------------------------------------------------------------------------------------------------------------------------------------------------------------------------------------------------------------------------------------------------------------------------------------------------------------------------------------------------------------------------------------------------------------------------------------------------------------------------------------------------------------------|
| <b>Template: pEPkan-S<br/>Addgene (Plasmid<br/>#41017)</b>                                                                      |                                                                                                                                                                                                                                                                                                                                                                                                                                                                                                                                                                                                                                                                                                                                                                                                                                                                                                                                                                                                      |
| mini-TurboID-Kan<br>SalI-S                                                                                                      | GCCCGT <u>CGT</u> CGACTCCACCAATCAGTACCTCTGGATCGGATTGGGGAGTTGAAG<br>AGCGGTAGGGATAACAGGGTAATCGATTT                                                                                                                                                                                                                                                                                                                                                                                                                                                                                                                                                                                                                                                                                                                                                                                                                                                                                                     |
| Kan SalI-AS                                                                                                                     | AAAGT <u>CGAC</u> GCCAGTGTTACAACCAATTAACC                                                                                                                                                                                                                                                                                                                                                                                                                                                                                                                                                                                                                                                                                                                                                                                                                                                                                                                                                            |
| <b>Flagx3 mini-TurboID</b><br>codon optimized<br>fragment (KpnI/SacII)<br>cloned into pBS SK+<br>vector with Gibson<br>assembly | <b><u>ATG</u></b> GATTATAAGGATGATGACAAGGGGGACTATAAAGACGACGATAAAGGGCGAC<br>TATAAGGACGATGATAAAGCGTCCATACCGCTGCTGAATGCAAACAGATCCTGG<br>GGCAGTTGGATGGTGGGAAGCGTCGCAGTGCTGCCCGTCGTCGACTCCACCAATCA<br>GTACCTCTGGATCGGATTGGGGAGTTGAAGAGCGGTGATGCGTGCATCGCGGA<br>GTACCAGCAAGCAGGCAGAGGTAGCCGCGGACGAAAATGGTTTAGTCCTTTTGGT<br>GCGAACCTGTACCTCAGCATGTTCTGGAGGCTCAAGAGAGGGCCCCGCGGCGATTG<br>GACTTGGCCCAGTAATCGGGATCGTCATGGCTGAGGCGCTCAGAAAACCTCGGAGC<br>TGATAAGGTTAGAGTAAAATGGCCGAACGACCTTTATTTGCAAGACCGAAAATTG<br>GCTGGGATATTGGTGGAACTTGCGGGCATTACCGGCGACGCGGCACAAATCGTCA<br>TAGGTGCCGGTATTAATGTGGCAATGCGCCGCGTTGAAGAGAGCGTGGTAAATCA<br>GGGATGGATAACCCTGCAAGAGGCAGGAATCAACCTGGACCGCAACACCCTGGCT<br>GCTATGCTCATTCCGGGAACTGAGAGCTGCGTTGGAGCTCTTTGAACAGGAAGGGC<br>TTGCACCGTACCTCAGTCGATGGGAAAAATTGGATAACTTCATAAATCGGCCTGTG<br>AAACTCATCATAGGCGACAAGGAAATCTTTGGCATTAGTCGAGGGATTGATAAGC<br>AAGGCGCACTCTTGCTCGAACAGGACGGAGTTATCAAACCTTGGATGGGTGGCGA<br>AATTAGTCTCAGAAGTGCAGAGAAGGAGTTTAGCCGAGCGGACT <b><u>TAA</u></b> |
| <b>Template: pBS-mini-<br/>TurboID Kan</b>                                                                                      |                                                                                                                                                                                                                                                                                                                                                                                                                                                                                                                                                                                                                                                                                                                                                                                                                                                                                                                                                                                                      |
| K9 mini-TurboID-S<br>(vIRF-1)                                                                                                   | <i>CTGTCGCCTCTCTATATCTGATGGCCGGTGGCTCCCCGGCATAGCTGTGCTTACCAC</i><br><i>TGGACATTGCGGCGCGAGCTAGTCTGGTTGCGGGACAATGGATTATAAGGATGA</i><br><b>TGACAAGGGGGAC</b>                                                                                                                                                                                                                                                                                                                                                                                                                                                                                                                                                                                                                                                                                                                                                                                                                                            |
| K9 mini-TurboID-AS                                                                                                              | <i>GTTCCCGGTGACCCTTGTGACAAACAAGGTTTTTTGGGTATCGCCCCAGGCGCCCC</i><br><i>AAAAGGGTTCCGGTCTTTGGCCTGGGTCCATGTCCGCTCGGCTAAACTCCTTCTCTG</i><br><b>TGACAAGGGGGAC</b>                                                                                                                                                                                                                                                                                                                                                                                                                                                                                                                                                                                                                                                                                                                                                                                                                                          |
| K10 mini-TurboID-S<br>(vIRF-4)                                                                                                  | <i>TAGCAAGAAGGGGGGCACTATAAGGCTCAGTCGGGACTGTGCCTCAAAGACGAA</i><br><i>CGCCGATCGGTTTCTGTGTCGGACCATGGATTATAAGGATGATGACAAGGGGGGA</i><br><b>C</b>                                                                                                                                                                                                                                                                                                                                                                                                                                                                                                                                                                                                                                                                                                                                                                                                                                                          |
| K10 mini-TurboID-AS                                                                                                             | <i>AAACCAGGAAAAATAGGGAAACTTATTGTTTTCAAGGGCATCAATAATCCATAACG</i><br><i>TGGCCATTCTGAGCCACCGGCTTAGGGTCCGCTCGGCTAAACTCCTTCTCTG</i><br><b>TGACAAGGGGGAC</b>                                                                                                                                                                                                                                                                                                                                                                                                                                                                                                                                                                                                                                                                                                                                                                                                                                               |

762 Restriction enzyme sites used to clone kanamycin cassette were underlined. Start and stop codon  
 763 for mini-TurboID coding sequence was marked with bold-underlined. Italic letters indicate  
 764 homology arms with KSHV genome for recombination. Bold letters anneal to cloned mini-  
 765 TurboID cassette for amplification DNA fragment for recombination.  
 766



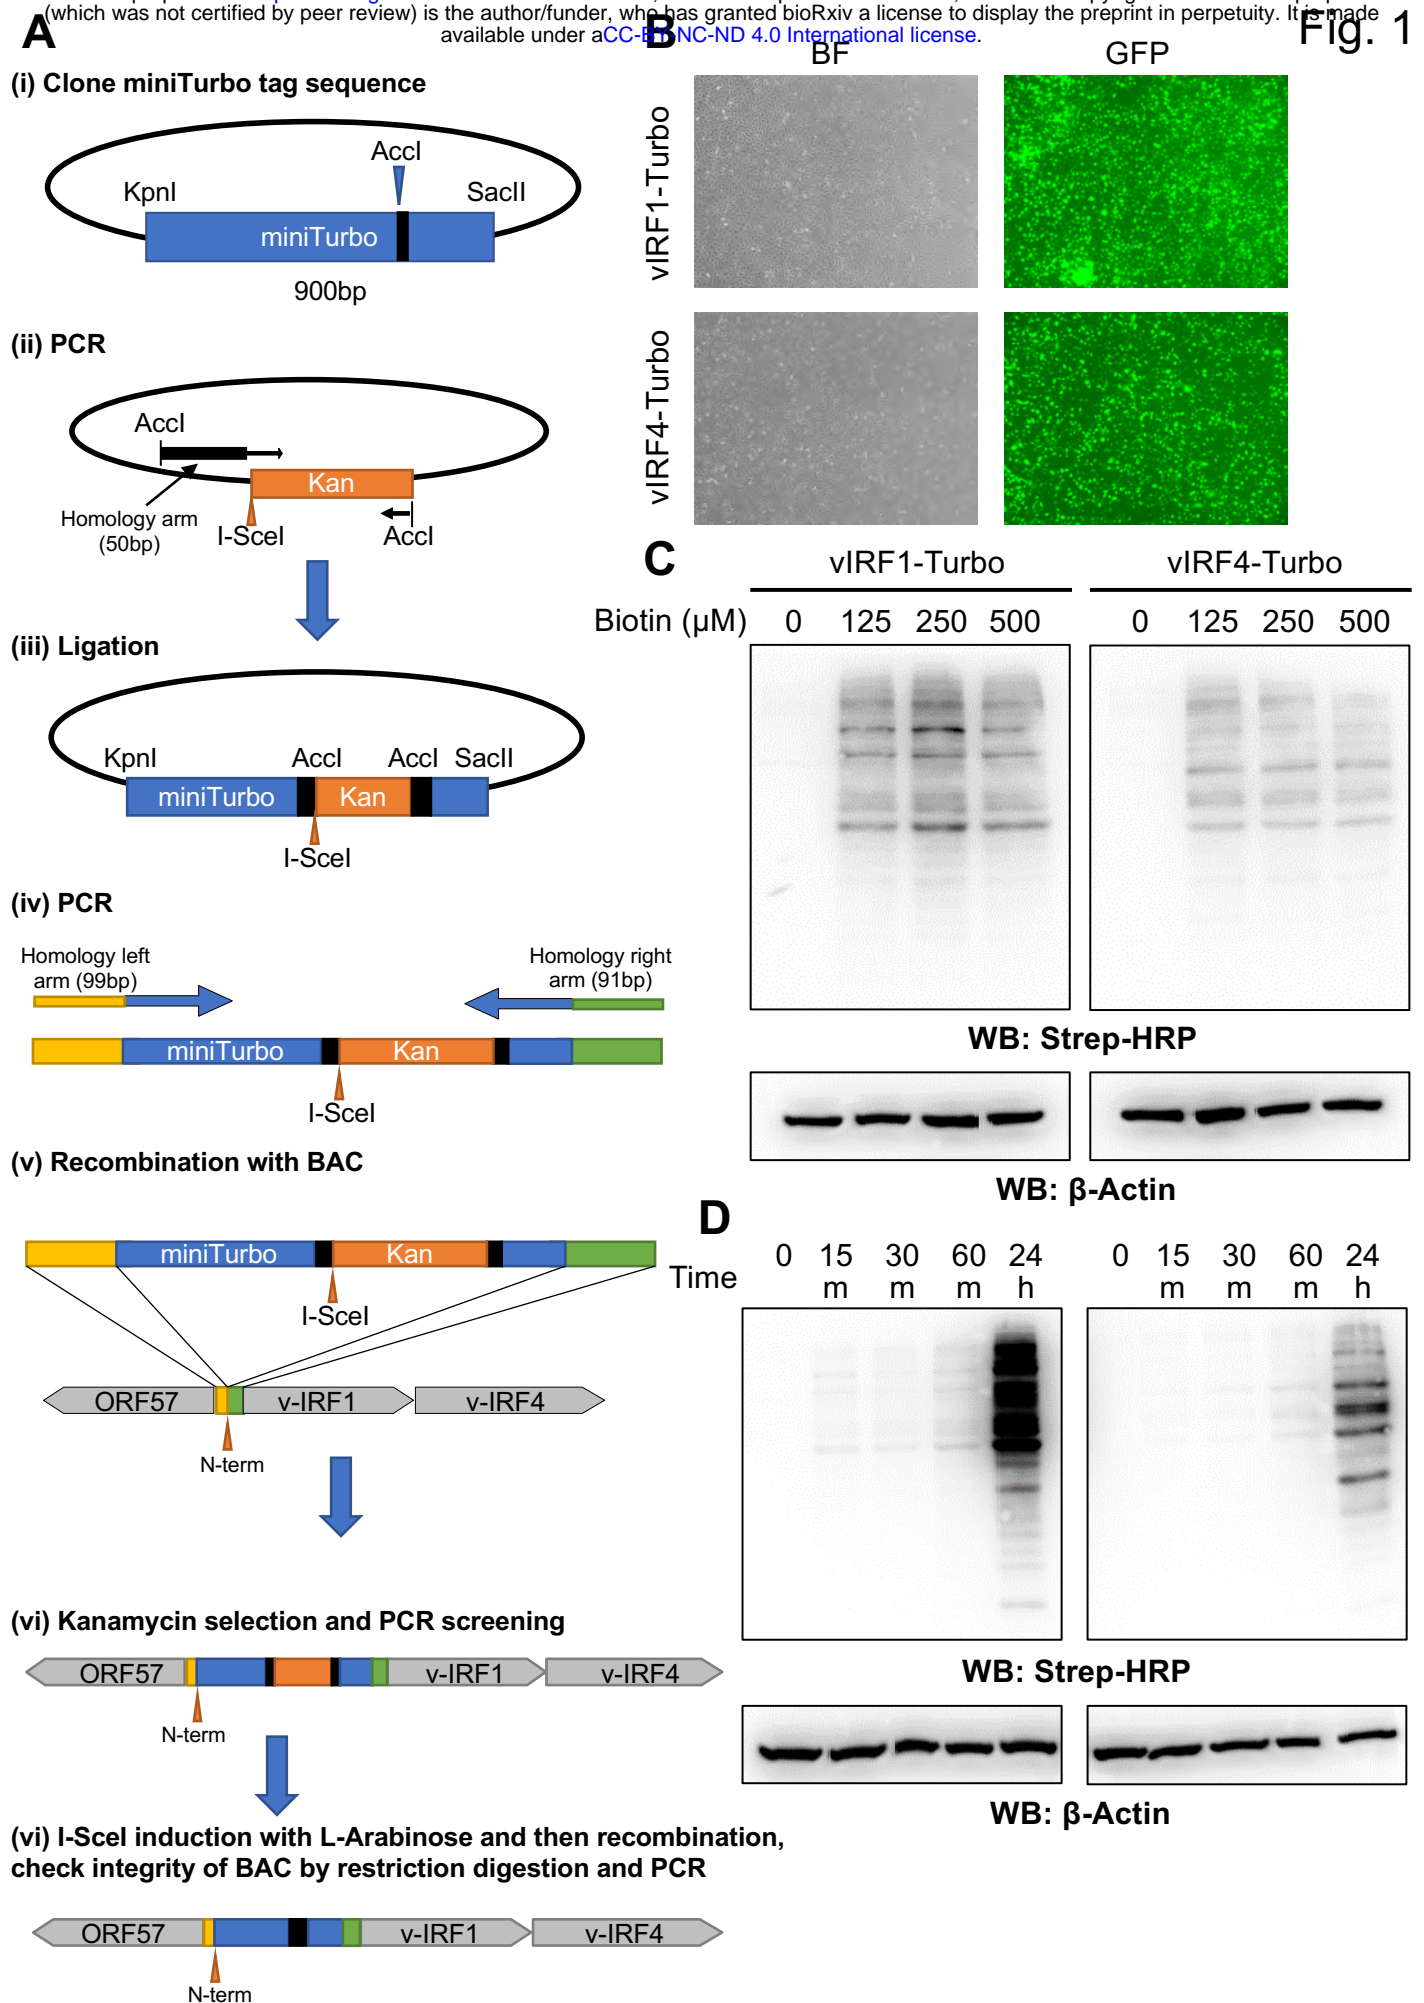

**A**

**vIRF1-Turbo**

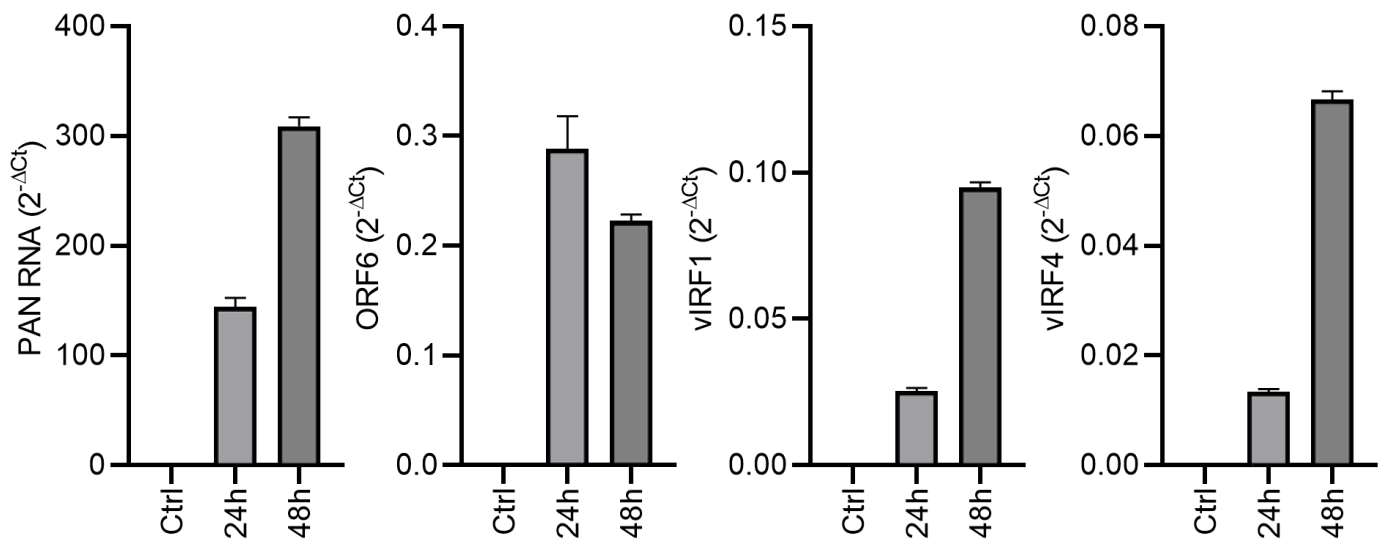

**vIRF4-Turbo**

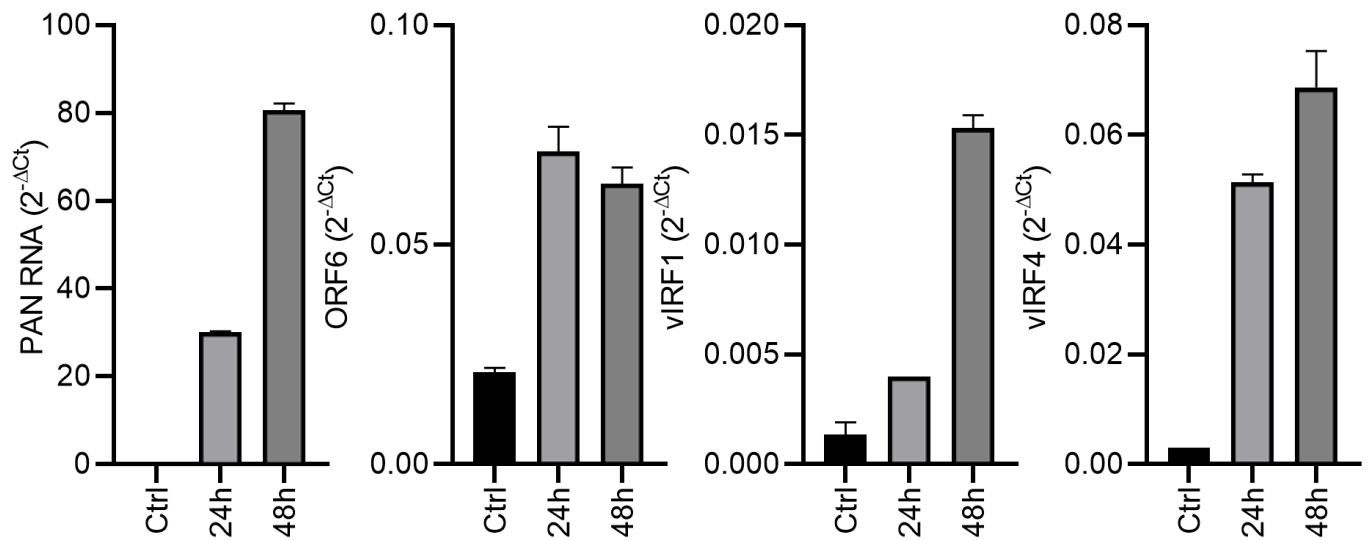

**B**

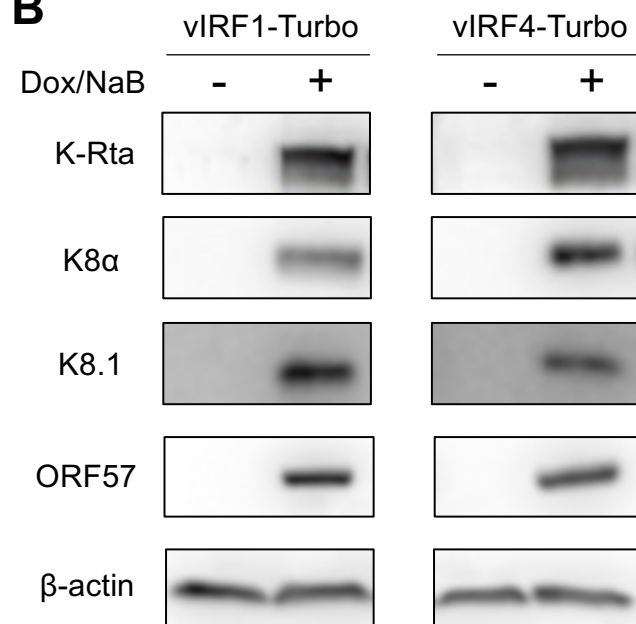

**C**

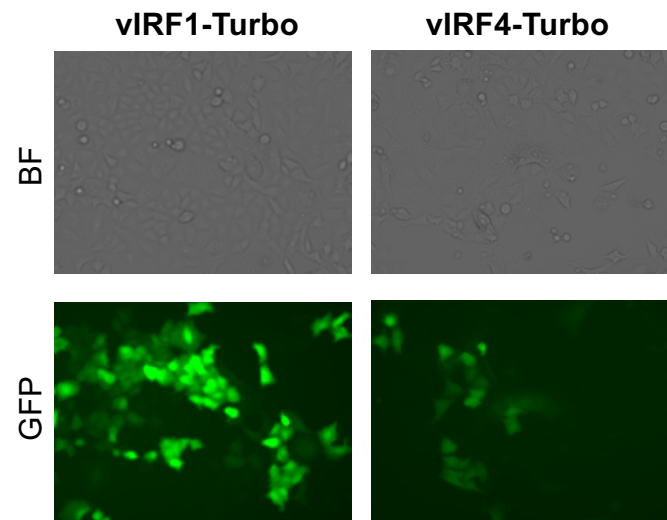

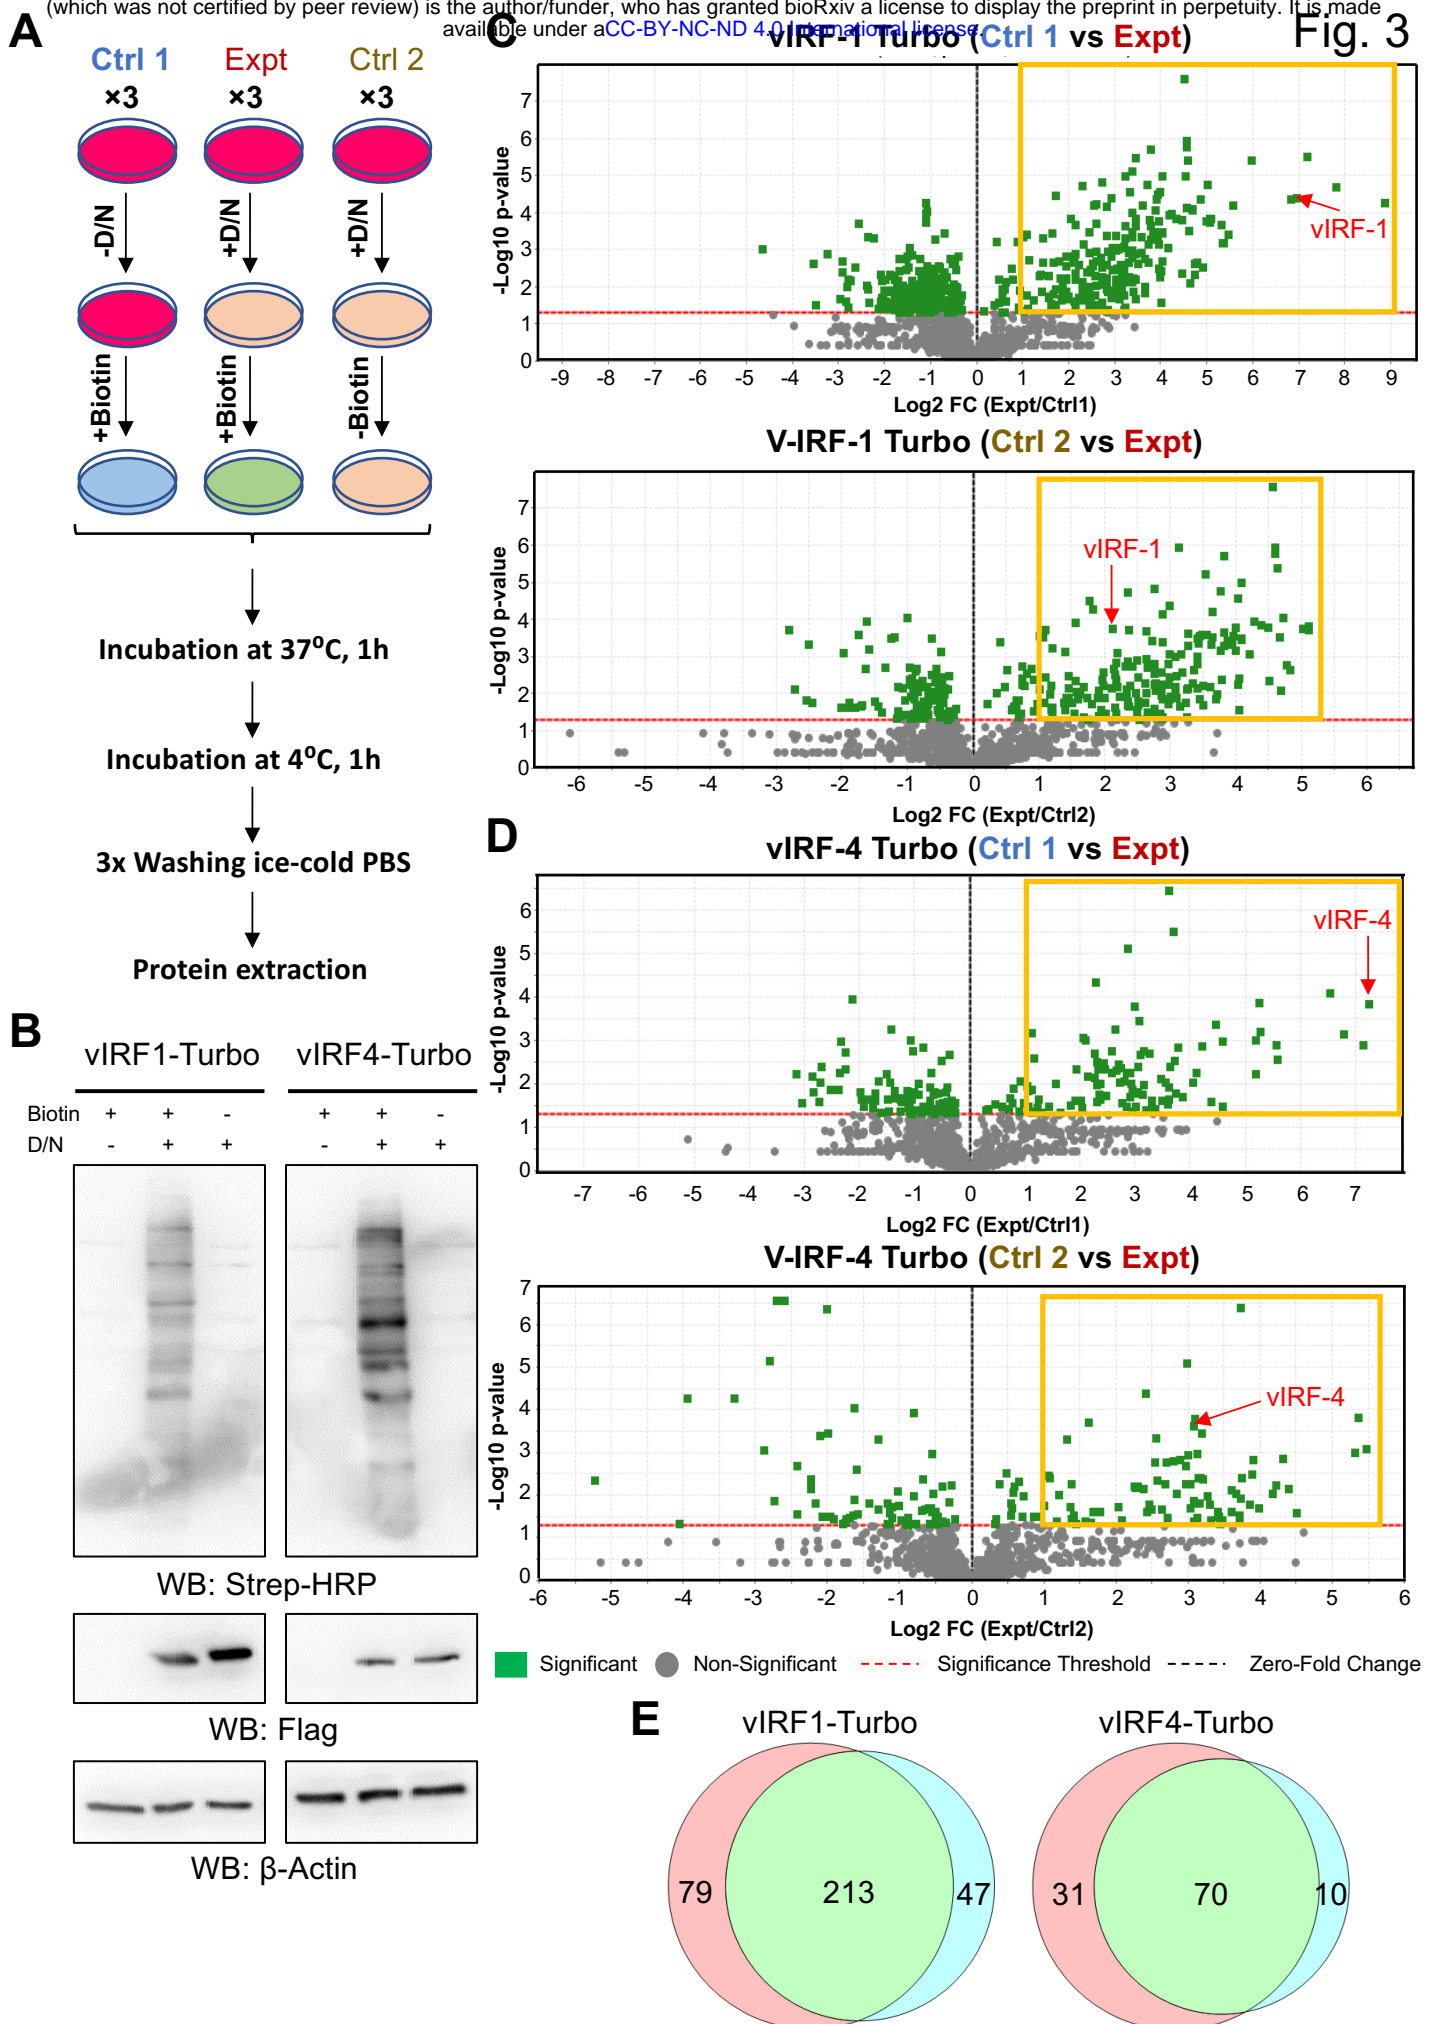



**A**

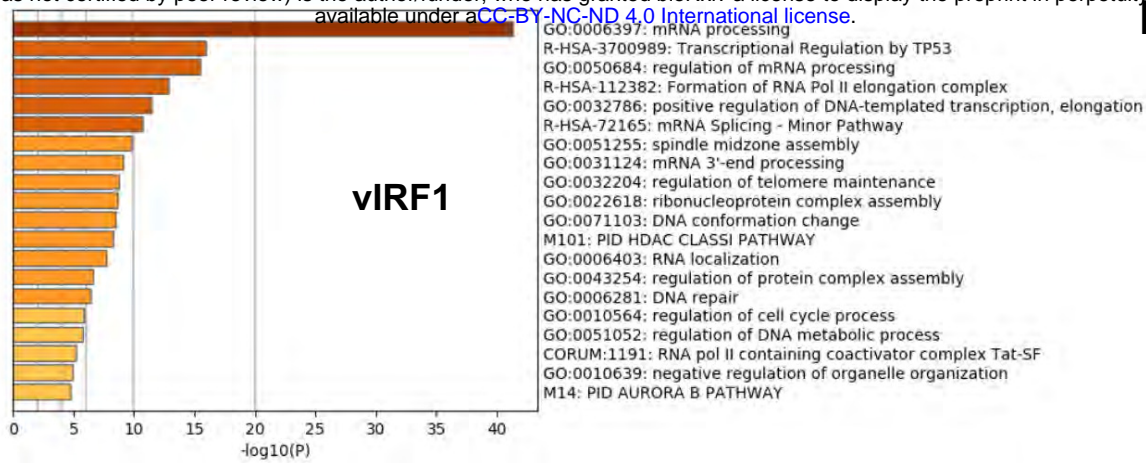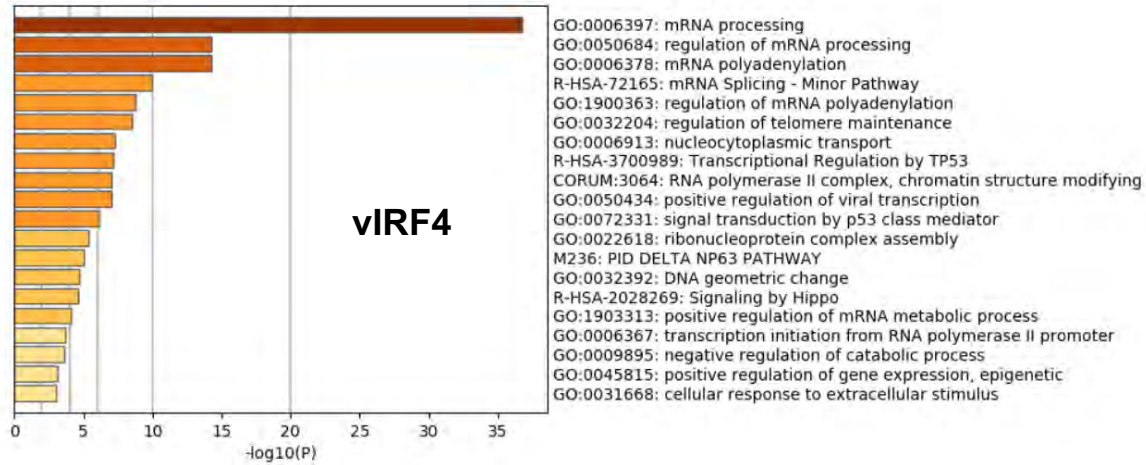

**B**

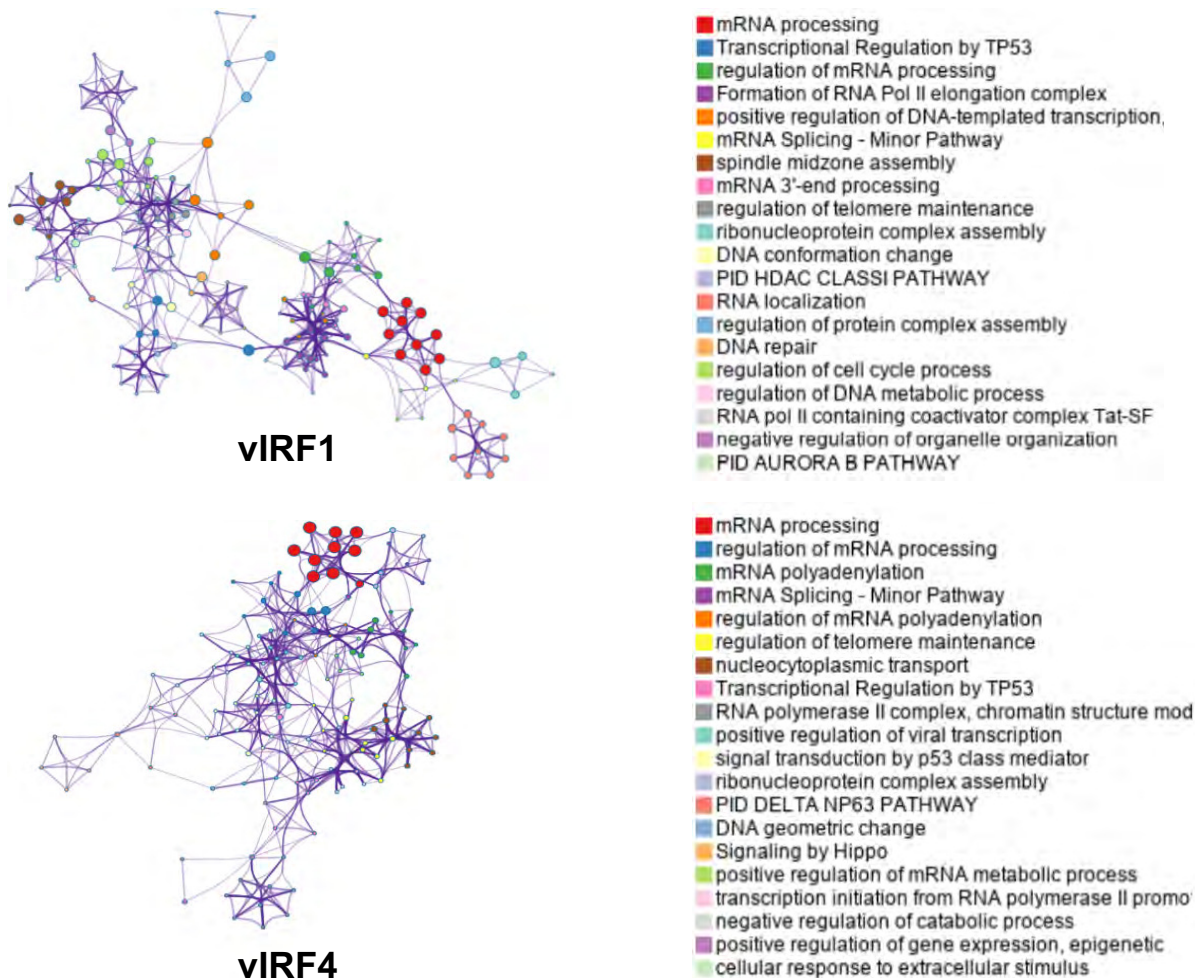

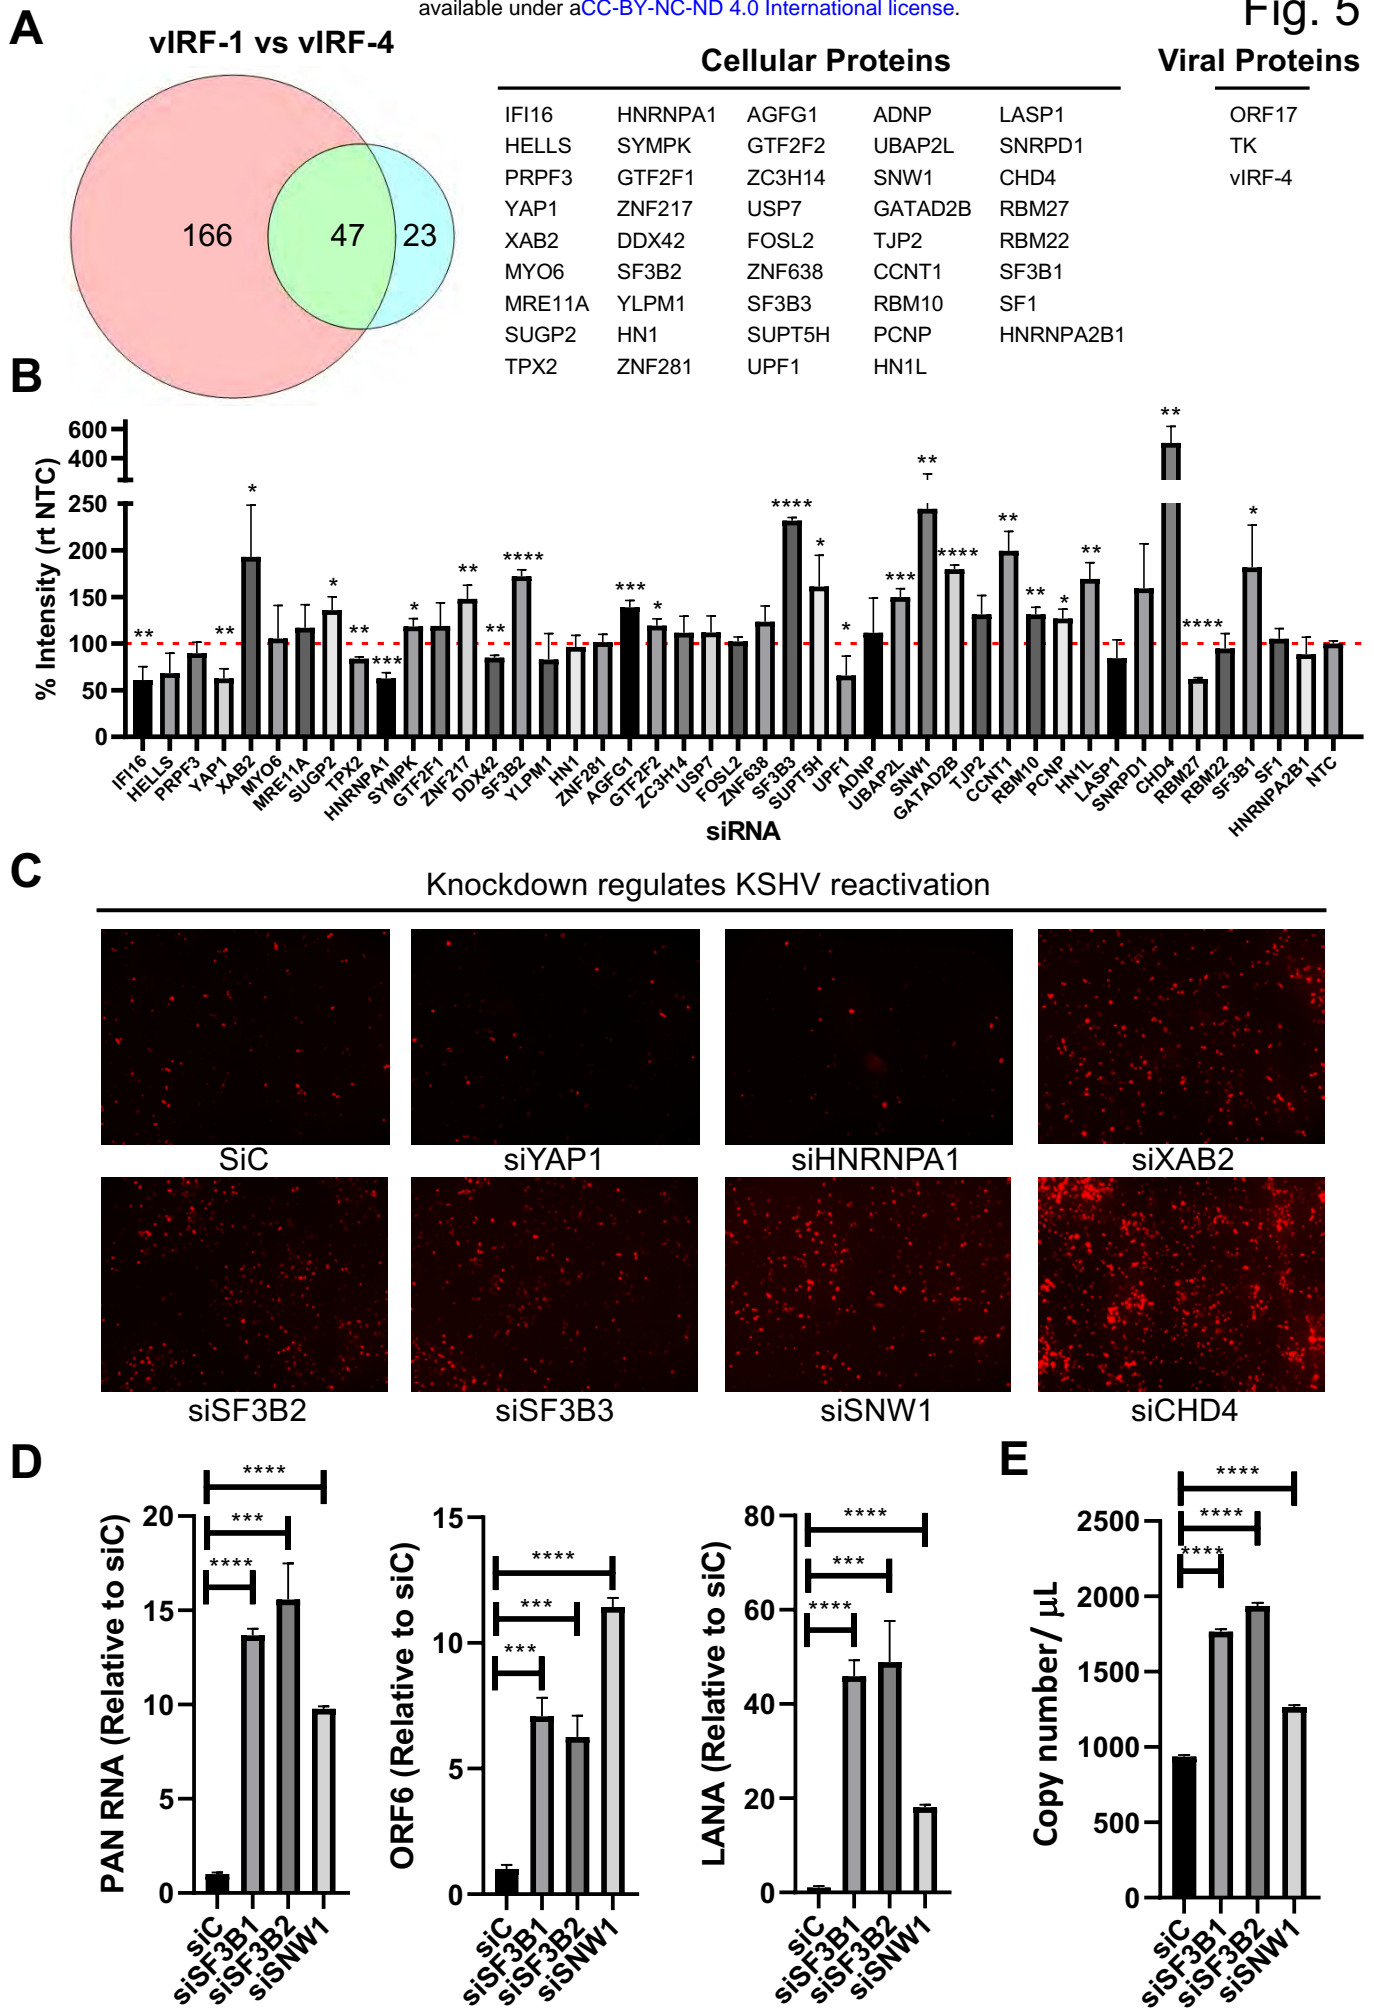

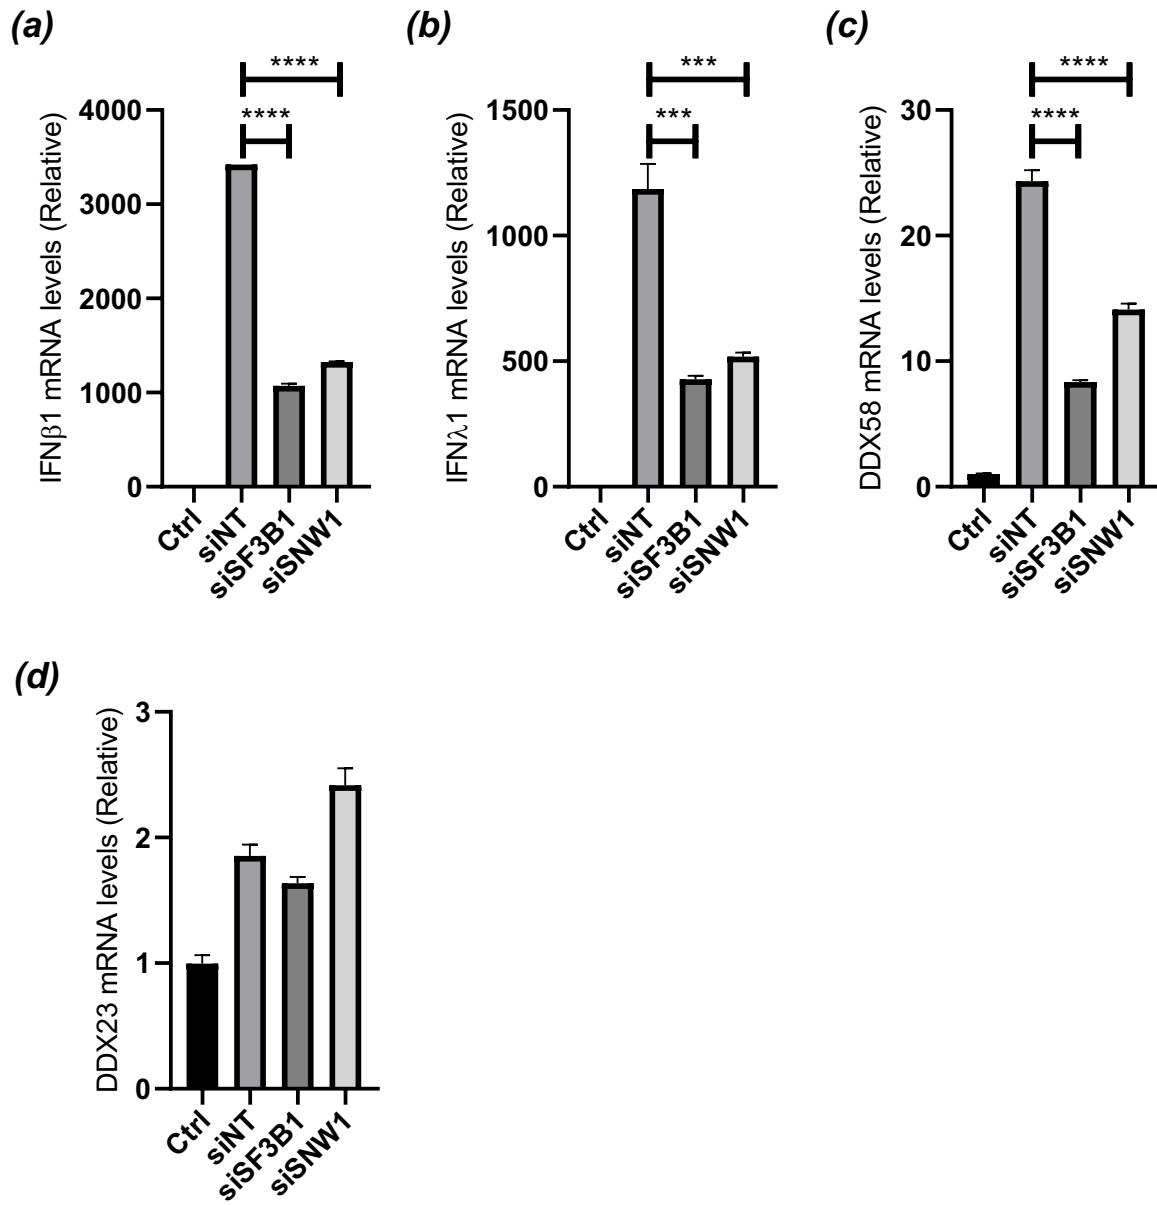

Source: https://www.biorxiv.org/content/10.1101/2020.10.16.343483v1.full.pdf
